# Supplementary material
Source: PubMed Central journal article supplement (PMC9669201)
Supplement: NIHMS1842093-supplement-321129_Data_Supplement.pdf [file NIHMS1842093-supplement-321129_Data_Supplement.pdf]

**SUPPLEMENTAL MATERIAL****Neuroinflammation plays a critical role in cerebral cavernous malformation disease**

Catherine Chinhchu Lai<sup>1\*</sup>, Bliss Nelsen<sup>1\*</sup>, Eduardo Frias-Anaya<sup>1\*</sup>, Helios Gallego-Gutierrez<sup>1\*</sup>, Marco Orecchioni<sup>2</sup>, Victoria Herrera<sup>1</sup>, Elan Ortiz<sup>1</sup>, Hao Sun<sup>1</sup>, Omar A. Mesarwi<sup>1</sup>, Klaus Ley<sup>2</sup>, Brendan Gongol<sup>3,4,&</sup>, Miguel Alejandro Lopez-Ramirez<sup>1,5,&</sup>

<sup>1</sup>Department of Medicine, University of California, San Diego, La Jolla, California, USA. <sup>2</sup>Division of Inflammation Biology, La Jolla Institute for Immunology, La Jolla, California, USA. <sup>3</sup>Department of Health Sciences, Victor Valley College, Victorville, California, USA. <sup>4</sup>Institute for Integrative Genome Biology, 1207F Genomics Building, University of California, Riverside, CA 92521, USA. <sup>5</sup>Department of Pharmacology, University of California, San Diego, La Jolla, California, USA.

\*These authors contributed equally

&These senior authors contributed equally

**Running title:** Neuroinflammation in CCM disease

**Address correspondence to:**

Dr. Brendan Gongol and Miguel A. Lopez-Ramirez

Victor Valley college, Victorville, CA, 92395, &

9500 Gilman Diver, BSB 5096, La Jolla, CA 92093

Telephone: 858-534-4425, FAX: 858-822-6458

[Brendan.gongol@ucr.edu](mailto:Brendan.gongol@ucr.edu)

[malopezramirez@health.ucsd.edu](mailto:malopezramirez@health.ucsd.edu)

**Conflict of interest statement:** The authors have declared that no conflict of interest exists

**29 Online Supplemental Materials**

30 Expanded Material &amp; Methods

31 Data supplement figures S1 to S9

32 Data supplement statistical tables I-IV

33 Reference 62

34

**35 Expanded Materials and Methods (Online Supplement)**

36

**37 Material and methods**

38

*39 Genetically modified animals*

40 Brain endothelial-specific conditional *Pdcd10*-null mice were generated by crossing a *Slco1c1*  
41 promoter-driven tamoxifen-regulated Cre recombinase (*Slco1c1-CreERT2*, a gift from Markus  
42 Schwaninger, University of Lübeck) strain with loxP-flanked *Pdcd10* (*Pdcd10<sup>fl/fl</sup>*, a gift from Wang  
43 Min, Yale University; *Slco1c1-CreERT2;Pdcd10<sup>fl/fl</sup>*) mice. Brain endothelial-specific conditional  
44 *Ikkb*-null mice were generated by *Slco1c1-CreERT2* strain with loxP-flanked *IKKb* (*Ikkb<sup>fl/fl</sup>*, a gift  
45 from Michael Karin, UCSD; *Slco1c1-CreERT2;Ikkb<sup>fl/fl</sup>*). On a postnatal day 1 (P1), mice were  
46 administered 50 µg of 4-hydroxy-tamoxifen (H7904, Sigma-Aldrich) by intragastric injection to  
47 induce genetic inactivation of the endothelial *Pdcd10* gene in littermates with *Slco1c1-*  
48 *CreERT2;Pdcd10<sup>fl/fl</sup>* (*Pdcd10<sup>BECKO</sup>*), and *Pdcd10<sup>fl/fl</sup>* mice were used as littermate controls. Injection  
49 of 4-hydroxy-tamoxifen at P5 was also performed and led to reduced CCM burden<sup>10</sup> and was  
50 used to assess lesions when the brain endothelial *Ikkb* gene was inactivated. We also used non-  
51 injected *Slco1c1-CreERT2;Pdcd10<sup>fl/fl</sup>* mice as littermate controls whose gene expression and  
52 histology were the same as in *Pdcd10<sup>fl/fl</sup>* mice. To perform Translational Ribosome Affinity  
53 Purification (TRAP) in astrocytes<sup>18</sup> we generated *Slco1c1-iCreERT2;Pdcd10<sup>fl/fl</sup>;Aldh111-*  
54 *EGFP/Rpl10a* and controls littermate *Pdcd10<sup>fl/fl</sup>;Aldh111-EGFP/Rpl10a*. All animal experiments  
55 were performed in compliance with animal procedure protocols approved by the University of  
56 California, San Diego Institutional Animal Care and Use Committee.

57

*58 Astrocyte ribosome isolation*

59 *Aldh111-EGFP/Rpl10a* mice crossed with the CCM mouse model were used to isolate TRAP  
60 mRNAs from astrocytes using the protocol and instructions as previously described<sup>13</sup>. Astrocyte-  
61 TRAP mRNAs were from brains of mice age P75.

62

*63 Brain endothelial cell (BEC) isolation*

64 Adult P75 *Pdcd10<sup>BECKO</sup>;Aldh111-EGFP/Rpl10a* mice (*Pdcd10<sup>BECKO</sup>*) and *Pdcd10<sup>fl/fl</sup>;Aldh111-*  
65 *EGFP/Rpl10a* (*Pdcd10<sup>fl/fl</sup>*) control littermates were sacrificed, and their brains were isolated and  
66 placed into cold solution A (0.5% bovine serum albumin (BSA) in DMEM and 1 µg/µl glucose,  
67 10mM HEPES, 1x penicillin-streptomycin). Meninges and choroid plexus were removed, and one  
68 brain of *Pdcd10<sup>BECKO</sup>* mice was minced using scissors in cold solution A. We used two brains  
69 of *Pdcd10<sup>fl/fl</sup>* mice that were pooled together to collect enough microvasculatures. Brain tissue  
70 suspension was then centrifuged at 1000g for 5 minutes at 4°C. The supernatant was removed  
71 and the tissue was digested with a collagenase/dispase solution (1mg/ml collagenase/dispase  
72 [Sigma-Aldrich], 20 units/ml DNase I [Sigma-Aldrich], and 0.150µg/ml tosyl-lysine-chloromethyl-  
73 ketone [Sigma-Aldrich] in DMEM)(51) at 37°C for 1 hour with vigorous shaking every 10 minutes.  
74 Tissue suspension was triturated using thin-tipped Pasteur pipettes until fully homogenous and  
75 centrifuged at 700g for 5 minutes at 4°C. The supernatant was removed, and the pellet was  
76 resuspended in 20ml of 25% BSA solution followed by centrifugation at 1000g for 20 minutes at  
77 4°C. Capillary fragments were pulled down to the bottom of the tube, remaining BSA and myelin  
78 were discarded, and the pellet was resuspended in cold solution A followed by centrifugation at  
79 700g for 5 minutes at 4°C. The supernatant was removed, and capillary fragments were incubated  
80 in collagenase/dispase solution at 37°C for 1 hour. Solution A was added to inactivate enzymatic  
81 activity, and the suspension was centrifuged once at 700g for 5 minutes at 4°C. The cell pellet  
82 was resuspended in ACK lysis (Gibco) buffer to lyse red blood cells, and then cells were  
83 centrifuged once at 700g for 5 minutes at 4°C. The supernatant was removed, and cells were  
84 then incubated with anti-CD45 coated beads and passed through a column, following the  
85 manufacturer's protocol (Miltenyi Biotec). Isolated BECs were recovered by negative selection  
86 and used for RNA-seq and histology analysis.

87

#### 88 *Leukocyte isolation and flow cytometry analysis*

89 *Pdcd10<sup>BECKO</sup>* mice and *Pdcd10<sup>fl/fl</sup>* control littermates were sacrificed, brains were collected and  
90 placed into cold solution A. Meninges, brain stem, white matter/brainstem were removed. Brain  
91 tissue was triturated using scissors and centrifuged at 1000g for 5 minutes. The supernatant was  
92 removed, and the pellet was incubated in pre-warmed collagenase/dispase solution for 40  
93 minutes at 37°C (with vigorous shaking every 10 minutes). After incubation, cold solution A was  
94 used to stop enzymatic activity, and the suspension was centrifuged at 600g for 10 minutes at  
95 4°C. The supernatant was removed, and the cell pellet was resuspended into a Percoll gradient  
96 (70% Percoll, 37% Red Percoll, 30% Percoll, respectively) as previously described by Guldner et

97 al., followed by centrifugation at 1000g for 25 minutes at room temperature. The final solution  
98 consisted of three distinct layers, with a buffy leukocyte layer at the interface of clear 70% Percoll  
99 and 37% Red Percoll and a thick myelin layer at the top of the tube. The leukocyte layer was  
100 extracted and resuspended in cold 1X HBSS in a fresh tube, followed by centrifugation at 600g  
101 for 7 minutes at 4°C. The supernatant was removed, and cells were resuspended in flow  
102 cytometry buffer (0.5% BSA, 2mM EDTA in PBS1X).

103

#### 104 *Flow cytometry characterization of immune cells*

105 After isolation cells were stained in the dark for 30 min at 4C with a mixture of anti-mouse CD45-  
106 PerCP (clone 30-F11, Biolegend), CD11b-PE-Cy7 (clone M1/70, Biolegend), TCRβ- PE (clone  
107 H57-597, Biolegend), CD4-BV786 (clone GK1.5, Invitrogen), CD8-BV421 (clone 53-6.7,  
108 Biolegend). CD19-APC-Cy7 (clone 6D5, Biolegend), Ly6G-FITC (clone 1A8, BD Biosciences),  
109 F4/80-BV711 (clone BM8, Biolegend), CD206-BV650 (clone C068C2, Biolegend), Ly6C-PE  
110 (clone HK1.4, Biolegend), CD64-APC (clone X54-5/7.1, Biolegend), CD11c-BV570 (clone N418,  
111 Biolegend), and CX3CR1-BV510 (clone SA011F11, Biolegend) antibodies and the LD FVS700  
112 fixable dye (cat# 564997, BD Biosciences). After staining, cells were washed with 1 mL of flow  
113 cytometry buffer, and fixed in 1x IC fixation buffer (e-biosciences) for 20 min at RT in the dark.  
114 Fixed cells were washed and resuspended in flow cytometry buffer, and acquired on a LSRII flow  
115 cytometer (BD Biosciences). Unstained cells and FMOs samples were also acquired as controls.  
116 Data was acquired with the FACSDiva software (BD Biosciences) and analyzed with FlowJo  
117 software (Treestar Inc).

118

#### 119 *RNA isolation*

120 Total RNA from brain tissue and BECs were isolated by TRIzol method according to the  
121 manufacturer's instructions (Thermo Fisher Scientific). For brains tissue and cells, 1ml of TRIzol  
122 was used to homogenize the tissue by passing it through a syringe several times. The lysates  
123 were transferred to Phase Lock Gel 2ml tubes, and 200µl of chloroform (Thermo Fisher Scientific)  
124 was added to each tube, mixing vigorously for 15 seconds, followed by incubation at room  
125 temperature for 3 minutes. Samples were then centrifuged at 12000g for 10 minutes at 4°C, and  
126 the aqueous phases containing RNA were collected and transferred to 1.5ml DNase/RNase free  
127 microfuge tubes. To precipitate RNA, 500µl of isopropanol was added, samples were  
128 resuspended and incubated for 10 minutes at room temperature followed by centrifugation at  
129 12000g for 10 minutes at 4°C. The supernatant was removed, and the pellet was washed with

130 1ml of 75% ethanol followed by centrifugation at 7500g for 5 minutes at 4°C. RNA was  
131 resuspended in water and the quantity (ND-1000 spectrophotometer; NanoDrop Technologies)  
132 and quality (TapeStation; Agilent) of total RNA were analyzed. Detailed procedures and complete  
133 RNAseq data are available in the U.S. National Center for Biotechnology Information (Bethesda,  
134 MD, USA) Gene Expression Omnibus (GEO) under accession number GSE204979  
135 (<http://www.ncbi.nlm.nih.gov/geo>).

136

#### 137 *RT-qPCR analysis*

138 A total RNA amount of 300 ng was used to produce single-stranded complementary DNA (cDNA)  
139 using random primers according to the manufacturer's protocol (Thermo Fisher Scientific). For  
140 gene expression analysis, 10 ng of cDNA was used with the Kapa SybrFast qPCR master mix  
141 (Kapa Biosystems) and thermal cycler (CFX96 Real-Time System; Bio-Rad) were used to  
142 determine the relative levels of the genes analyzed according to the manufacturer's protocol. Actin  
143 mRNA levels were used as internal control, and the  $2^{-\Delta\Delta CT}$  method was used for analyses of the  
144 data.

145

#### 146 *RNA-sequencing (RNA-seq)*

147 Total RNA was assessed for quality using an Agilent TapeStation 4200, and 50 nanograms of  
148 RNA from samples with an RNA Integrity Number (RIN) greater than 8.0 were used to generate  
149 RNA-seq libraries using the Illumina® Stranded mRNA Prep (Illumina, San Diego, CA). Samples  
150 were processed following manufacturer's instructions. Resulting libraries were multiplexed and  
151 sequenced with 100 basepair (bp) Paired End reads (PE100) to a depth of approximately 25  
152 million reads per sample on an Illumina NovaSeq 6000. Samples were demultiplexed using  
153 bcl2fastq Conversion Software (Illumina, San Diego, CA). Sequencing analysis was performed  
154 using the R programming environment and the RiboSeq systemPipeR workflow. All reads were  
155 aligned to the Mus Musculus GRCm39 genome version 104 using hisat2 read alignment software.  
156 Read counting was performed using the GenomicFeatures library and the corresponding  
157 GRCm39 GTF file from ensemble. All fold change calculations were performed using EdgeR.  
158 When values are normalized by a percentile ranking, the reads per kilobase per million (RPKM)  
159 values in the heatmap were normalized as previously described using the empirical cumulative  
160 distribution function in R to calculate the percent of values that have an equal or lesser value to  
161 each represented record<sup>62</sup>. This normalization was applied uniformly throughout the illustrated

162 data in order to provide an accurate representation of the magnitude of the values in relation to  
163 each other.

164

#### 165 *Inflammasome activity assay*

166 BECs were isolated and resuspended in EBM-2 media (Lonza) supplemented with 0.1%  
167 gentamicin, 0.1% ascorbic acid, 0.1% heparin, and 0.2% BSA. Cells were incubated with the  
168 NLRP3 inhibitor MCC950 Sodium (10  $\mu$ M;) or vehicle and seeded onto poly-lysine-treated  
169 coverslips for 1 hour at 37°C. After incubation, coverslips were washed three times using 1X  
170 HBSS + Ca<sup>+2</sup>, and then incubated with 30X FAM-FLICA Caspase-1 probe (ImmunoChemistry  
171 Technologies) in EBM-2 media plus supplements for 1 hour at 37°C as described by the  
172 manufacturer's protocol (ImmunoChemistry Technologies). Rat monoclonal antibody against  
173 VCAM1 (Alexa-674 labelled, clone 429(MVCAM.A)) and CD45 (Alexa-594, clone S18009D) were  
174 incubated at room temperature for 30 min (BioLegend). Preparations were fixed in 4% PFA in  
175 PBS and mounted on microscope slides using Fluoromount-G mounting medium  
176 (SouthernBiotech). The slides were viewed with a fluorescent microscope (Keyence), and the  
177 images were captured with BZX-700 software (Keyence). The quantification analysis was  
178 performed using ImageJ Ver.1.53f on high-resolution images.

179

#### 180 *Immunohistochemistry*

181 Brains from *Pdcd10*<sup>BECKO</sup> and littermate control *Pdcd10*<sup>fl/fl</sup> mice at the specific age points were  
182 isolated and fixed in 4% PFA in PBS at 4°C overnight. Tissue was placed into cryoprotective 30%  
183 sucrose solution in PBS, and then embedded and frozen in O.C.T compound (Fischer Scientific).  
184 Brains were cut using a cryostat into 18- $\mu$ m sagittal sections onto Superfrost Plus slides (VWE  
185 International). Sections were incubated in a blocking-permeabilization solution (0.5% Triton X-  
186 100, 5% goat serum, 0.5% BSA, in PBS) for 2 hours and then incubated in rabbit polyclonal  
187 antibodies against GFAP (1:300; GA524; Agilent Dako), rat polyclonal antibodies against GFAP  
188 (1:200; Thermo Fisher Scientific), rabbit polyclonal antibodies against Iba1 (1:100; 019-19741;  
189 FUJIFILM Wako) in PBS at room temperature overnight. Slides were washed one time in brain  
190 Pblec buffer (1X PBS, 1mM CaCl<sub>2</sub>, 1mM MgCl<sub>2</sub>, 0.1 mM MnCl<sub>2</sub>, and 0.1% Triton X-100) and  
191 incubated with isolectin B4 (IB4) FITC conjugated (1:80, L2895; Sigma-Aldrich) in brain-Pblec  
192 buffer at 4°C overnight. Tissue sections were washed four times in PBS and incubated with  
193 suitable Alexa Fluor coupled secondary antibodies (1:300, Thermo Fisher Scientific) in PBS for  
194 2h at RT. Cell nuclei were stained with DAPI and mounted using Fluoromount-G mounting

195 medium (SouthernBiotech). Fresh frozen brain tissue was used to perform immunofluorescence  
196 analysis of leukocyte infiltration. Rat monoclonal antibody against CD41 (Alexa-488/594, clone  
197 MWRReg30), CD45 (Alexa-fluor 594, clone S18009D), CX3CR1 (Alexa-fluor 488, clone  
198 SA011F11), LY6G (Alexa-fluor 488, clone 1A8), CD16/32 (PE/Dazzle 594, clone S17011E),  
199 CD206 (Alexa-fluor 488, clone C068C2), were incubated at room temperature for 30 min  
200 (BioLegend). Preparations were fixed in 4% PFA in PBS and incubated with rabbit polyclonal  
201 antibodies against GFAP overnight followed by isolectin B4 (IB4) biotin conjugated (1:80) in brain-  
202 Pblec buffer at 4°C overnight. After streptavidin (Alexa-Fluor 647) staining and followed by  
203 incubation with suitable Alexa Fluor coupled secondary antibodies, and the cell nuclei were  
204 stained with DAPI and mounted with Fluoromount-G mounting medium (SouthernBiotech). The  
205 slides were viewed with a high-resolution slide scanner (Olympus VS200 Slide Scanner), and the  
206 images were captured with VS200 ASW V3.3 software (Olympus). Quantifications were  
207 performed blinded. The quantification analysis was performed using ImageJ Ver. 1.53f on high-  
208 resolution images. Four to five brain sections per mouse were used for analysis.

209

#### 210 *CCM lesion quantification*

211 Brains from *Pdcd10<sup>BECKO</sup>Ikkb<sup>+/+</sup>*, *Pdcd10<sup>BECKO</sup>;Ikkb<sup>BECKO/+</sup>* and *Pdcd10<sup>BECKO</sup>;Ikkb<sup>BECKO</sup>* mice were  
212 isolated and fixed in 4% PFA at 4°C overnight. After cryoprotection, sucrose (30%) and freezing,  
213 18  $\mu$ m sections of sagittal brain tissue were cut onto Superfrost Plus slides (VWR International),  
214 and stained by the hematoxylin and eosin (5 brain sections/mouse, sections were performed from  
215 superior sagittal sinus to the cerebral hemisphere). Slides were imaged using NanoZoomer Slide  
216 Scanner (Hamamatsu Photonics; San Diego, USA). Lesions were analyzed as stage 1, single  
217 cavernous, or stage 2, multi-cavernous and thrombosis. Quantifications were performed blinded.  
218 The quantification analysis was performed using Hamamatsu Photonics software.

219

#### 220 *Statistical analysis*

221 Statistical analysis was performed using Prism software (GraphPad). Data are expressed as  
222 mean values  $\pm$  standard error of the mean (SEM) for multiple individual and biological  
223 experiments. For all experiments, the number of independent and biological replicates (n) is  
224 indicated. The Shapiro-Wilk normality test with alpha=0.05 assessed the normality of data. For  
225 comparison between two groups, Student's unpaired two-tail *t-test* or analysis of variance  
226 (ANOVA) for comparison among multiple groups, followed by the Tukey post hoc test, was used  
227 for normally distributed data. Mann-Whitney two-tailed test was used for two groups, and the

228 Kruskal-Wallis test, followed by Dunn's post hoc test, was used for non-normally distributed  
229 data. Sample sizes were calculated by assuming a two-sided  $\alpha=0.05$ , 80% power, and  
230 homogeneous variances for two samples with the means and standard deviation from previous  
231 studies<sup>4,13,15,16</sup>. At least three biologically independent experiments were conducted to ensure  
232 reproducibility. No statistical across-test comparisons were performed in this manuscript.

233

#### 234 *Representative figures*

235 Representative images were selected as the best representative image from a group of images  
236 taken in each experiment.



237  
238

## Supplemental Figure 1. Increase of hypoxia and coagulation signaling pathways in CCM

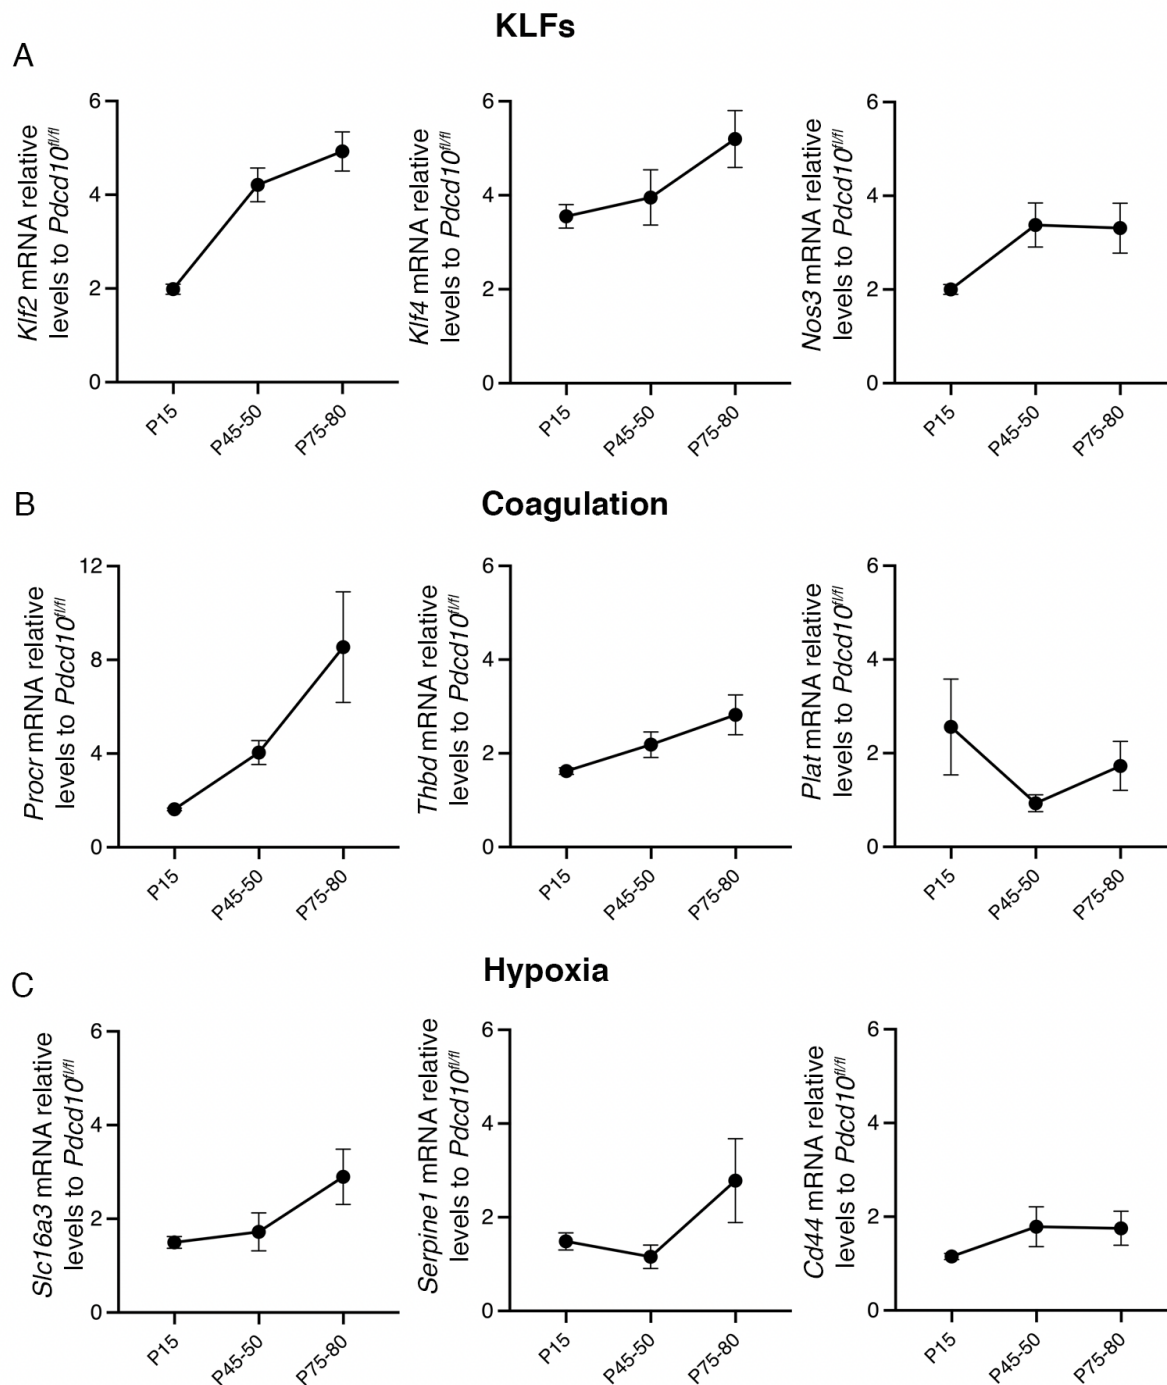

239 **disease.** CCM lesions are present in the cerebrum of *Pdcd10<sup>BECKO</sup>* mice at acute (P15),  
 240 progression (P50), and chronic stage (P80). **A**, Analysis of *Klf2*, *Klf4*, *Nos3*, **B**, Analysis of *Procr*,  
 241 *Thbd*, *Plat*, **C**, Analysis of *Slc16a3*, *Serpine1*, and *Cd44* mRNA levels by RT-qPCR in cerebral  
 242 tissue from mice in samples from Fig 1b. Cerebral tissue from *Pdcd10<sup>fl/fl</sup>* littermates were used as  
 243 control. Data are mean  $\pm$ SEM, P50 mice, n = 3; P15 and P80 mice n = 6.

244

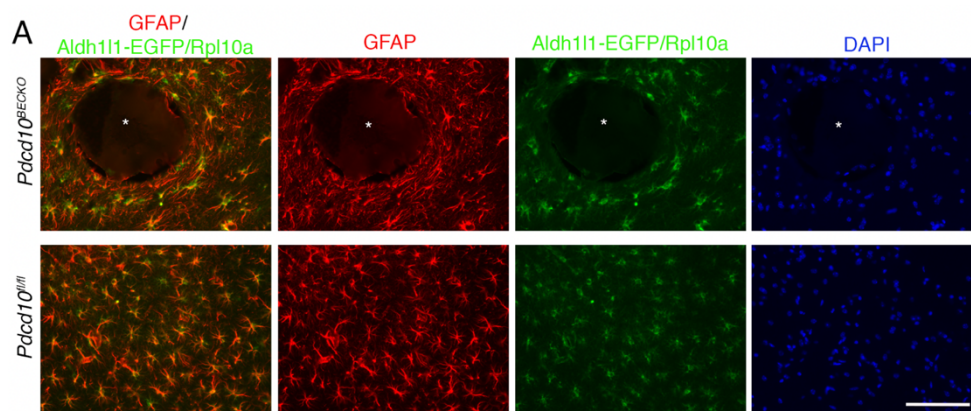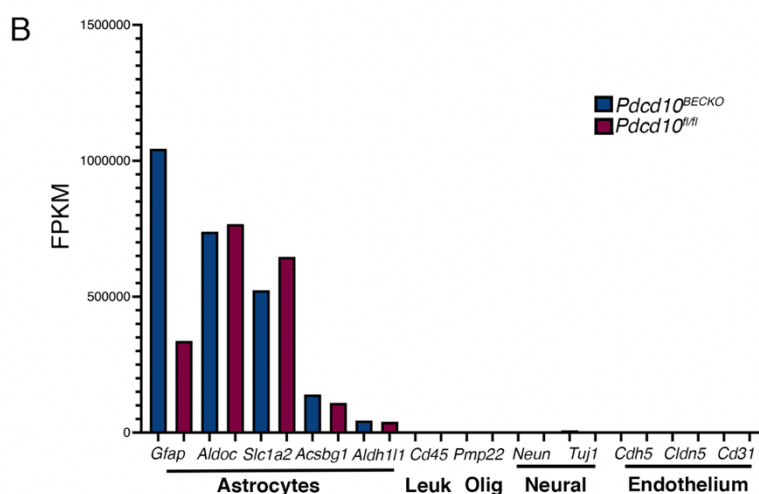

245

246

**Supplemental Figure 2. Neuroinflammatory astrocytes in CCM disease.** **A**,

Immunofluorescence analysis show colocalization of GFAP+ astrocytes with cells expressing

EGFP-RpL10a in *Pcdcd10<sup>fl/fl</sup>;Aldh111-EGFP/RpL10a* brains sections. Asterisks denote the vascular

lumen of CCM lesions. Scale bar is 100  $\mu$ m. n = 3 mice in each group. **B**, Analysis of known brain

cell-specific gene markers from *Pcdcd10<sup>BECKO</sup>;Aldh111-EGFP/RpL10a* (blue bar) and

*Pcdcd10<sup>fl/fl</sup>;Aldh111-EGFP/RpL10a* littermate controls (red bar) following ribosome-bound mRNA

analysis by RNA-seq. n = 3 in each group.

254

255

256

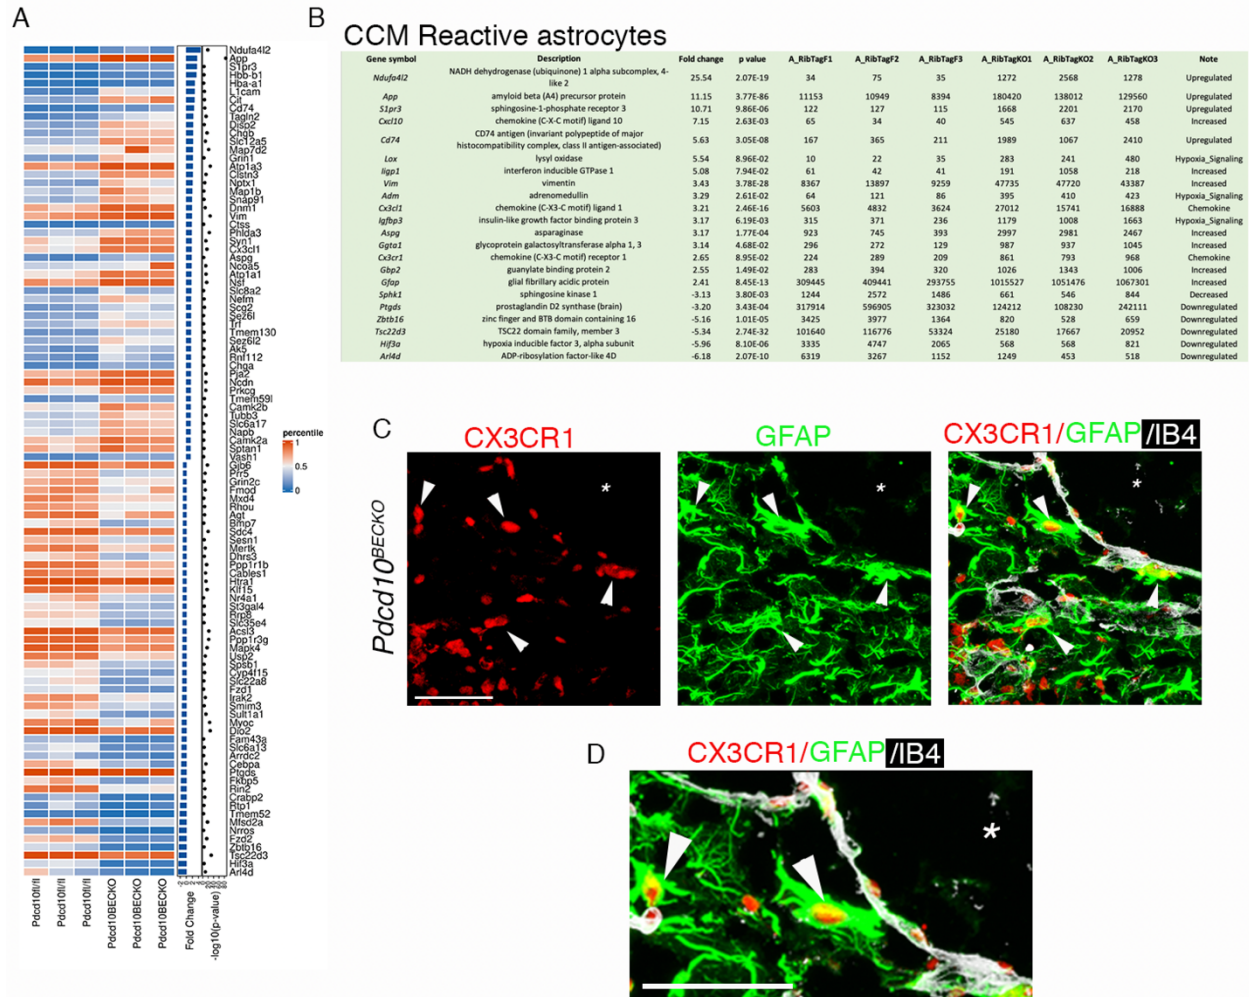

257  
 258 **Supplemental Figure 3. CCM reactive astrocytes in CCM disease.**  
 259 **A**, Heatmap where values are normalized by a percentile ranking (percent of values that have an equal or lesser value to  
 260 each record<sup>62</sup>) of differentially expressed transcripts in P75 *Pdcd10<sup>BECKO</sup>;Aldh11-EGFP/Rpl10a*  
 261 versus littermate control *Pdcd10<sup>fl/fl</sup>;Aldh11-EGFP/Rpl10a*. Transcripts are represented on fold  
 262 change. The significantly down- and up-regulated genes are labeled in red. n = 3 mice in each  
 263 group. **B**, Gene expression pattern associated with CCM reactive astrocyte from  
 264 *Pdcd10<sup>BECKO</sup>;Aldh11-EGFP/Rpl10a* brains. Fold change and *P* values are shown for each gene.  
 265 n = 3 mice in each group. **C**, Confocal microscopy of brain from P50 *Pdcd10<sup>BECKO</sup>* mice stained  
 266 for CX3CR1 (red), GFAP-positive astrocytes (green) and endothelial marker isolectin B4 (white).  
 267 Asterisk indicates vascular lumen of CCM lesion. **D**, Magnified region from *C*. Arrowheads  
 268 indicate colocalization between GFAP+ Astrocytes and CX3CR1 protein. Fold change and *P*  
 269 values are shown for each gene and reads values for each biological replicate. n = 3 mice in each  
 270 group.

271  
 272  
 273  
 274  
 275

276

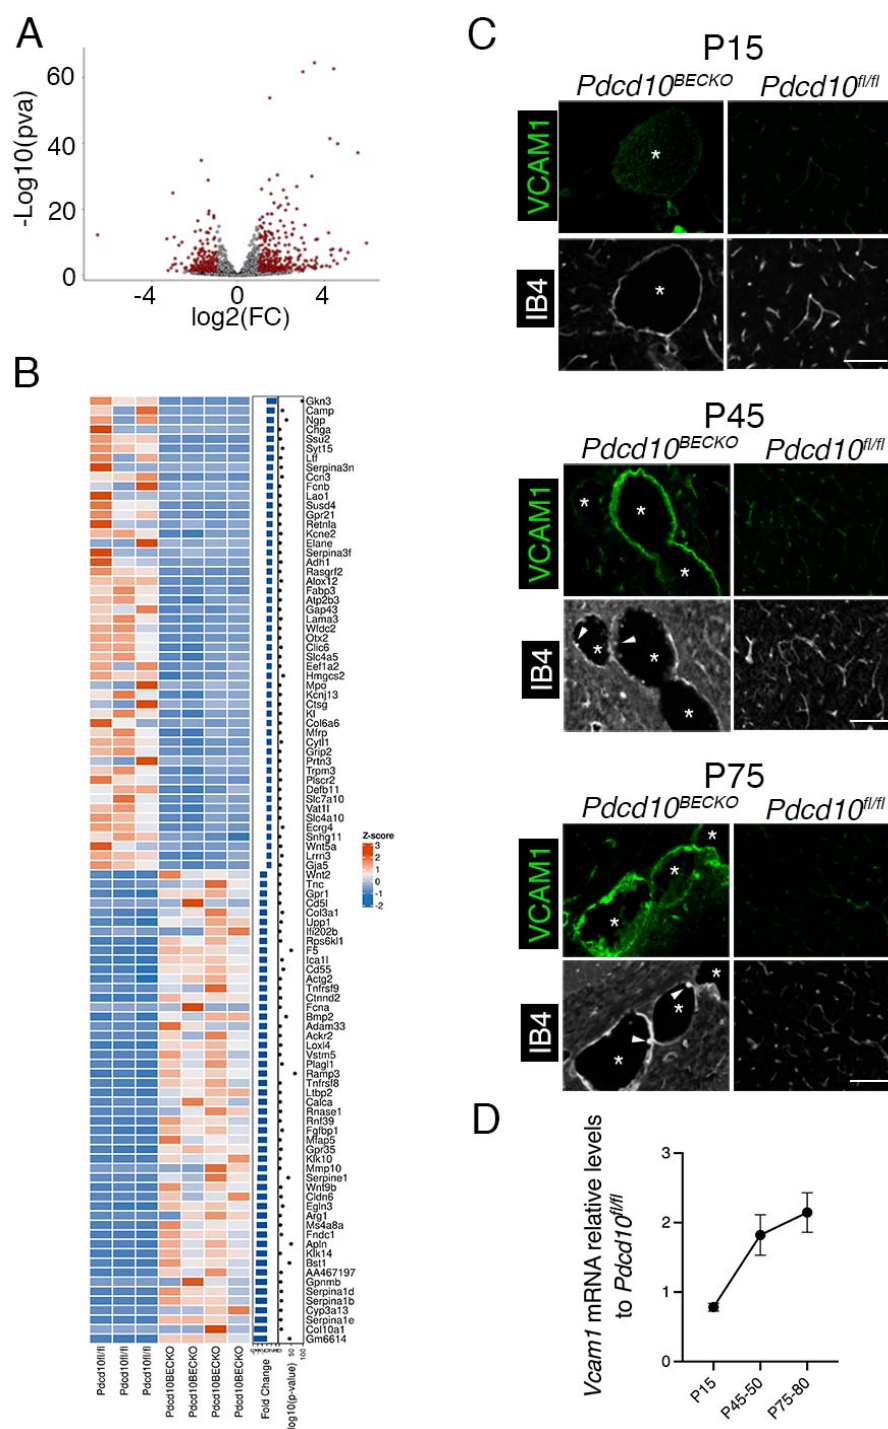

277  
 278 **Supplemental Figure 4. Inflammation pathway is increased in the CCM endothelium. A,**  
 279 **Volcano plot of differentially expressed transcripts in fresh isolated brain endothelial cells from**  
 280 ***P75 Pcdcd10<sup>BECKO</sup>;Aldh111-EGFP/Rpl10a* versus isolated brain endothelial cells from littermate**  
 281 **control *Pcdcd10<sup>fl/fl</sup>;Aldh111-EGFP/Rpl10a*. Transcripts are represented on a log2 scale from Fig.**  
 282 **3A. B, List of the top 50 up- or down-regulated genes from isolated brain endothelial cells obtained**

283 from *Pdcd10<sup>BECKO</sup>;Aldh111-EGFP/Rpl10a* brains. Fold change and *P* values are shown for each  
 284 gene. *Pdcd10<sup>BECKO</sup>;Aldh111-EGFP/Rpl10a* mice, n=4; *Pdcd10<sup>fl/fl</sup>;Aldh111-EGFP/Rpl10a* mice, n=3.  
 285 Heatmaps comparing the mean expression of DEG. **C**, Immunofluorescence staining of VCAM1  
 286 (green) and endothelial marker isolectin B4 (white). Asterisks indicate vascular lumen of CCM  
 287 lesions of *Pdcd10<sup>BECKO</sup>* mice at acute (P15), progression (P50), and chronic stage (P80).  
 288 Arrowhead indicate leukocyte adhered to the endothelial wall in CCM lesions. Fold change and *P*  
 289 values are shown for each gene. n = 3 mice in each group. **D**, Analysis of *Vcam1* mRNA levels  
 290 by RT-qPCR in cerebral tissue from mice at acute, progression, and chronic stage as indicated.  
 291 Data are mean  $\pm$ SEM, P50 mice n = 4; P15 and P80 mice n = 6.  
 292

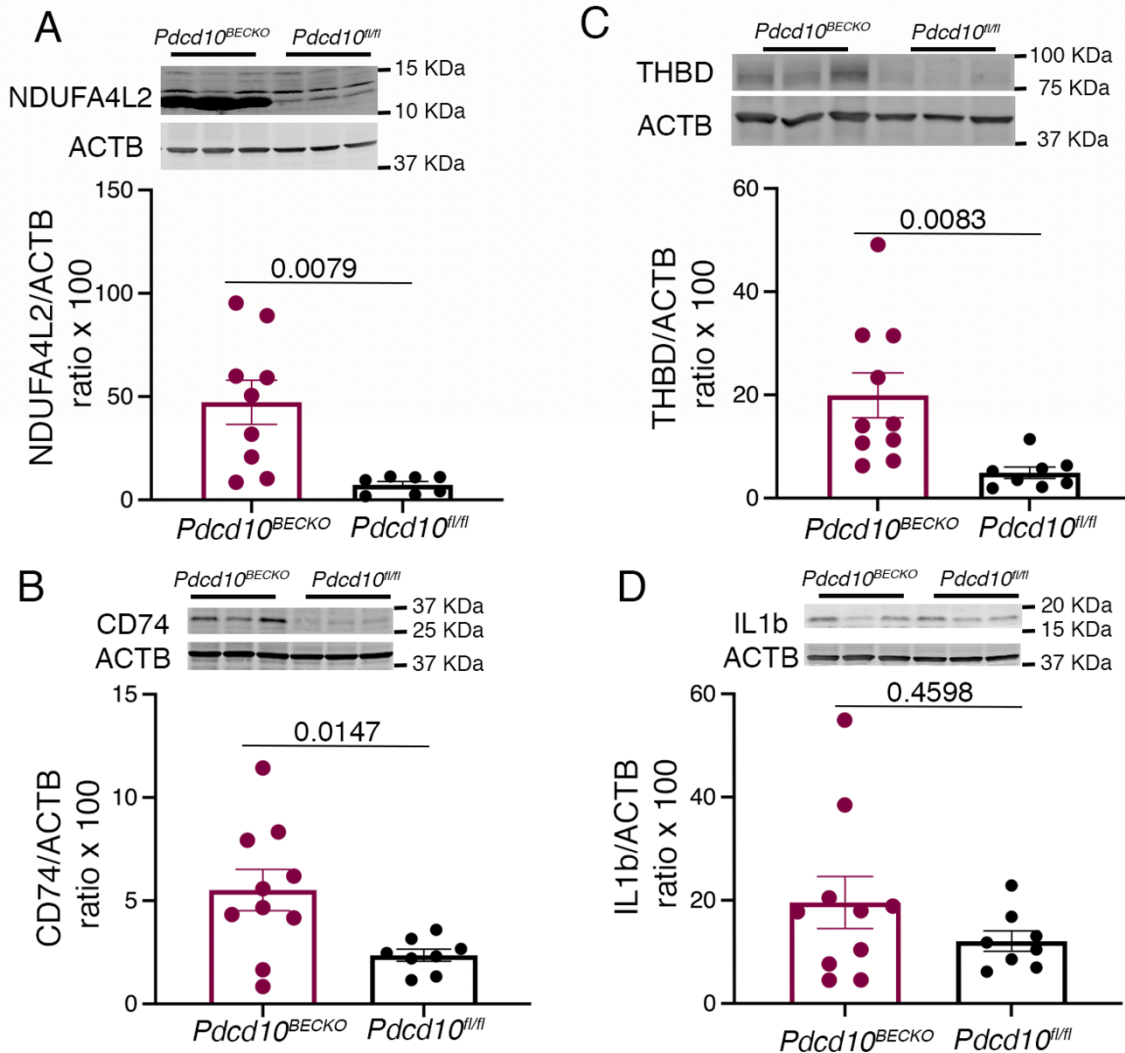

293  
 294  
 295  
 296  
 297  
 298  
 299  
 300

**Supplemental Figure 5. Validation of CCM endothelium and reactive astrocyte proteins increased in the CCM brain tissue.** **A**, Quantification of NDUFA4L2 protein in P80 *Pdcd10<sup>BECKO</sup>* brains compared to *Pdcd10<sup>fl/fl</sup>* brain controls by western blot. Data are mean  $\pm$ SEM, *Pdcd10<sup>BECKO</sup>* mice, n=9; *Pdcd10<sup>fl/fl</sup>* mice, n=7 (2-tailed Mann-Whitney test). **B**, Quantification of CD74 protein in P80 *Pdcd10<sup>BECKO</sup>* brains compared to *Pdcd10<sup>fl/fl</sup>* brain controls by western blot. Data are mean  $\pm$ SEM, *Pdcd10<sup>BECKO</sup>* mice, n=10; *Pdcd10<sup>fl/fl</sup>* mice, n=8 (2-tailed unpaired *t* test). **C**, Quantification of THBD (TM) protein in P80 *Pdcd10<sup>BECKO</sup>* brains compared to *Pdcd10<sup>fl/fl</sup>* brain controls by western

301 blot. Data are mean  $\pm$ SEM, *Pdcd10<sup>BECKO</sup>* mice, n=10; *Pdcd10<sup>fl/fl</sup>* mice, n=8 (2-tailed unpaired *t*  
 302 test). **D**, Quantification of IL1 $\beta$  protein in P80 *Pdcd10<sup>BECKO</sup>* brains compared to *Pdcd10<sup>fl/fl</sup>* brain  
 303 controls by Western blot. Data are mean  $\pm$ SEM, *Pdcd10<sup>BECKO</sup>* mice, n=10; *Pdcd10<sup>fl/fl</sup>* mice, n=8  
 304 (2-tailed Mann-Whitney test).

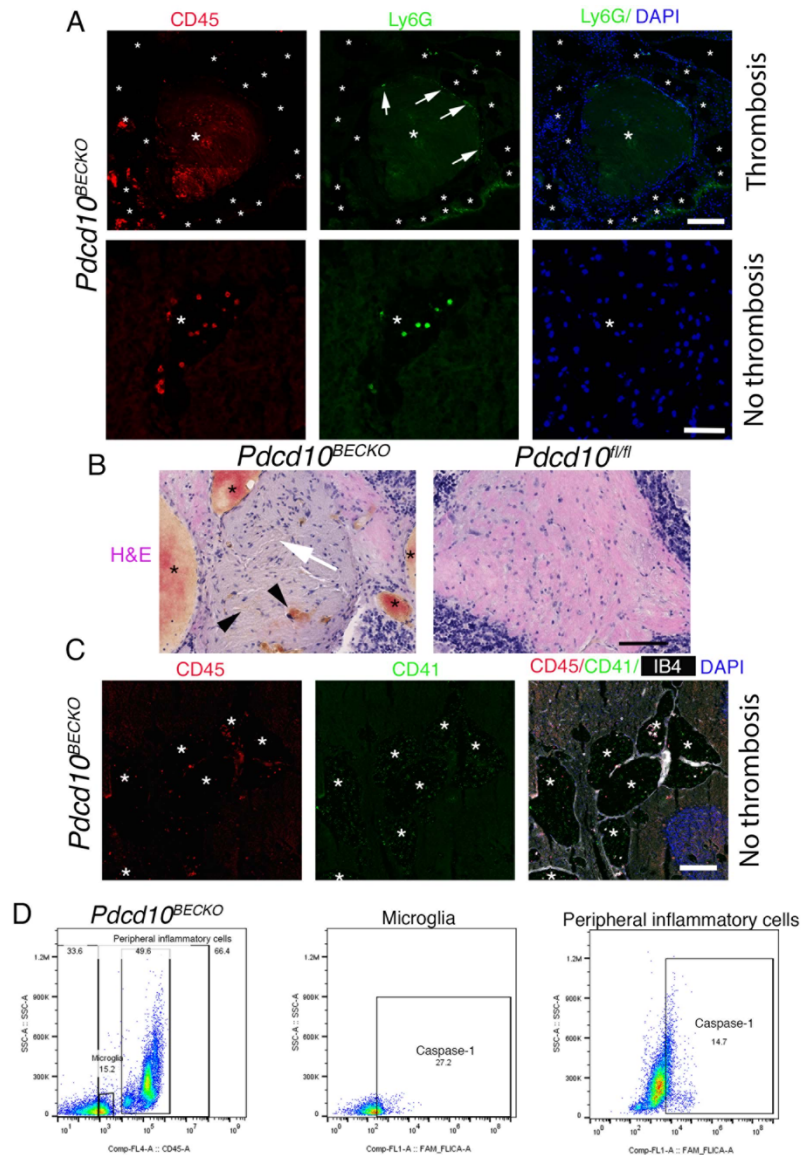

305  
 306 **Supplemental Figure 6. Increased presence of CD45+ and Ly6G+ cells in CCM brain tissue.**  
 307 **A**, Immunofluorescence analysis from a serial section used in Fig. 5b and 5c shows leukocyte  
 308 recruitment CD45+ (red) and accumulation of Ly6G+ neutrophils (green, arrows) in the vascular  
 309 lumen and vessel wall of lesions in P75 *Pdcd10<sup>BECKO</sup>* brains, respectively. Non-thrombus lesions  
 310 also show the presence of Ly6G+ neutrophils (green). Nuclei are labelled by DAPI (blue).  
 311 Asterisks denote vascular lumen of CCM lesions. Scale bar, 200  $\mu$ m (top) and 50  $\mu$ m (bottom).  
 312 **B**, Hematoxylin & eosin staining of a serial section in Fig. 5g, Arrow indicates an area of  
 313 thrombosis, arrowheads indicate bleeding, and asterisks denote the vascular lumen of CCM  
 314 lesions. Scale bar is 100  $\mu$ m. **C**, Immunofluorescence analysis for leukocytes CD45+ (red),  
 315 platelets CD41+ (green) cells and labeling of the brain vasculature, using isolectin B4 (white), of

316 non-thrombotic multi-cavernous lesion in *Pdcd10<sup>BECKO</sup>* brains. Asterisks denote vascular lumen of  
 317 CCM lesions. Scale bar, 100  $\mu$ m. **D**, FACS analysis and quantification of caspase-1 activation in  
 318 peripheral inflammatory cells (CD45+ high) and microglia (CD45+ low). Data is one experiment  
 319 representative of 3.

320  
 321

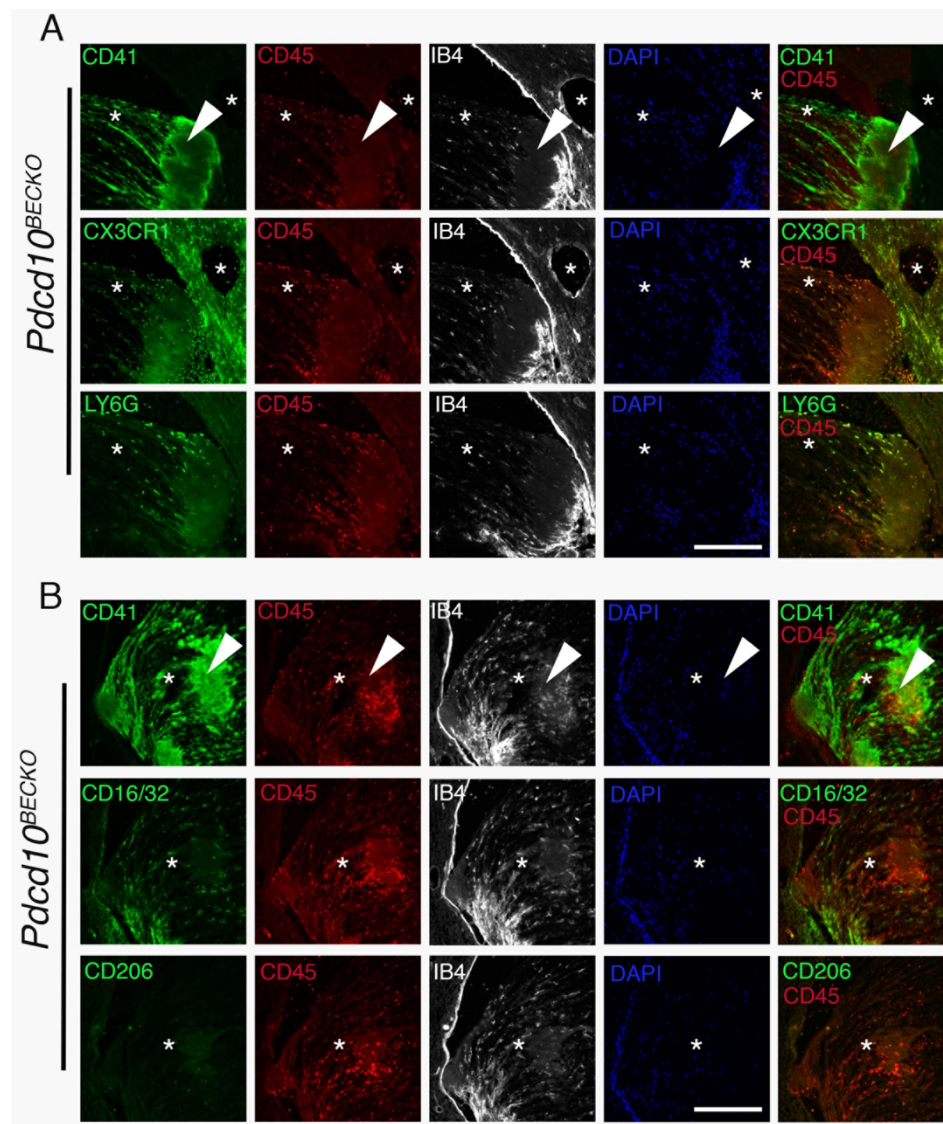

322

323

324 **Supplemental Figure 7. Presence of CD45+, CX3CR1+, Ly6G+, and CD16/32+ cells in the**  
 325 **thrombosis area of CCM brain tissue. A**, Immunofluorescence analysis from serial sections  
 326 shows leukocyte recruitment CD45+ (red) and accumulation of CX3CR1+ monocytes, Ly6G+  
 327 neutrophils in the thrombus (CD41+, green) formed in the vascular lumen of lesions in P75  
 328 *Pdcd10<sup>BECKO</sup>* brains. Asterisks denote vascular lumen of CCM lesions. Arrowheads denote  
 329 vascular thrombus. Scale bar, 200  $\mu$ m. Nuclei are labeled by DAPI (blue). **B**, Immunofluorescence  
 330 analysis from serial sections shows leukocyte recruitment CD45+ (red) and accumulation of  
 331 CD16/32+ monocytes, but not CD206+ monocytes in the thrombus (CD41+, green) formed in the  
 332 vascular lumen of a lesion in P75 *Pdcd10<sup>BECKO</sup>* brains. Asterisks denote vascular lumen of CCM

333 lesions. Arrowheads denote vascular thrombus. Scale bar, 200  $\mu$ m. Nuclei are labeled by DAPI  
 334 (blue).  
 335

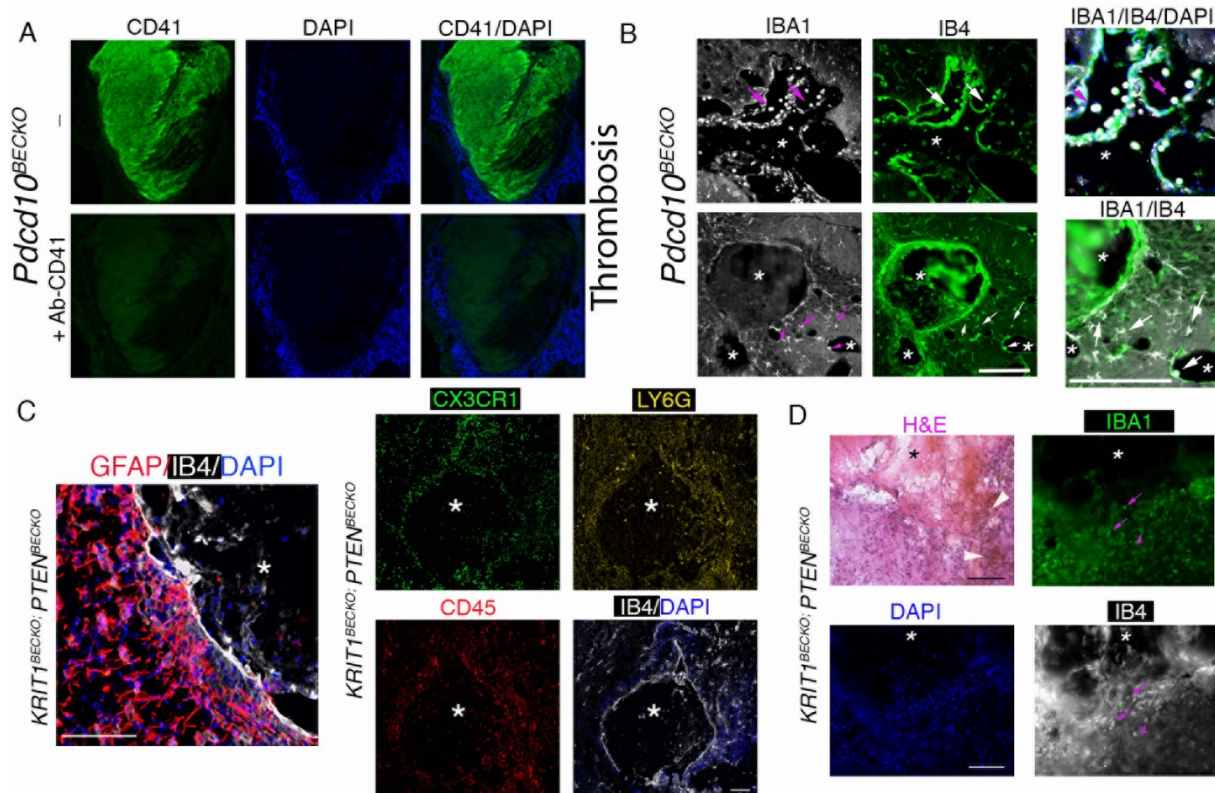

336  
 337 **Supplemental Figure 8. Immunofluorescence of CD41+ thrombus and IBA1+IB4 leukocytes**  
 338 **in the vascular lumen and brain parenchyma of CCM brain tissue. A,** Immunofluorescence  
 339 analysis of a thrombus (CD41+, green) formed in the vascular lumen of a lesion in P80  
 340 *Pdc10<sup>BECKO</sup>* brain. To confirm CD41+ immunoreactivity, a serial section was pre-treated with a  
 341 monoclonal anti-CD41 antibody non-labeled (MWRReg30) or vehicle for 1 h at room temperature.  
 342 After washes, the brain tissue was incubated with a CD41-Alexa-488 antibody (MWRReg30).  
 343 Asterisks denote vascular lumen of CCM lesions. Nuclei are labeled by DAPI (blue). Scale bar,  
 344 200  $\mu$ m. **B,** Immunofluorescence staining of IBA1+ microglia and myeloid cells (white), and  
 345 endothelial marker isolectin B4 (IB4; green) of cerebral sections from P80 *Pdc10<sup>BECKO</sup>*.  
 346 Immunofluorescence analysis shows IBA1+IB4+ leukocytes (Arrows) in the lumen and brain  
 347 parenchyma in P80 *Pdc10<sup>BECKO</sup>* brains. Asterisks denote vascular lumen of CCM lesions. Scale  
 348 bar, 200  $\mu$ m. **C,** Immunofluorescence staining of GFAP+ astrocytes (red) and endothelial marker  
 349 isolectin B4 (IB4; white) from serial sections of CCM lesions, where leukocyte recruitment CD45+  
 350 (red) and accumulation of CX3CR1+ (green), and Ly6G+ neutrophils (yellow) formed in the  
 351 vascular lumen of a lesion in P50 *Krit1<sup>BECKO</sup>;PTEN<sup>BECKO/wt</sup>* brains. **D,** H&E and  
 352 immunofluorescence analysis from serial sections shows CCM lesions and leukocyte/microglia  
 353 recruitment IBA1+ (green) formed in the vascular lumen and CNS parenchyma of lesions in P50  
 354 *Krit1<sup>BECKO</sup>;PTEN<sup>BECKO/wt</sup>* spinal cords. Endothelial marker is isolectin B4 (IB4; white). Asterisks  
 355 denote vascular lumen of CCM lesions. Arrowhead (H&E) and arrows (immunostaining) denote  
 356 leukocytes. Scale bar, 100  $\mu$ m. Nuclei are labeled by DAPI (blue).



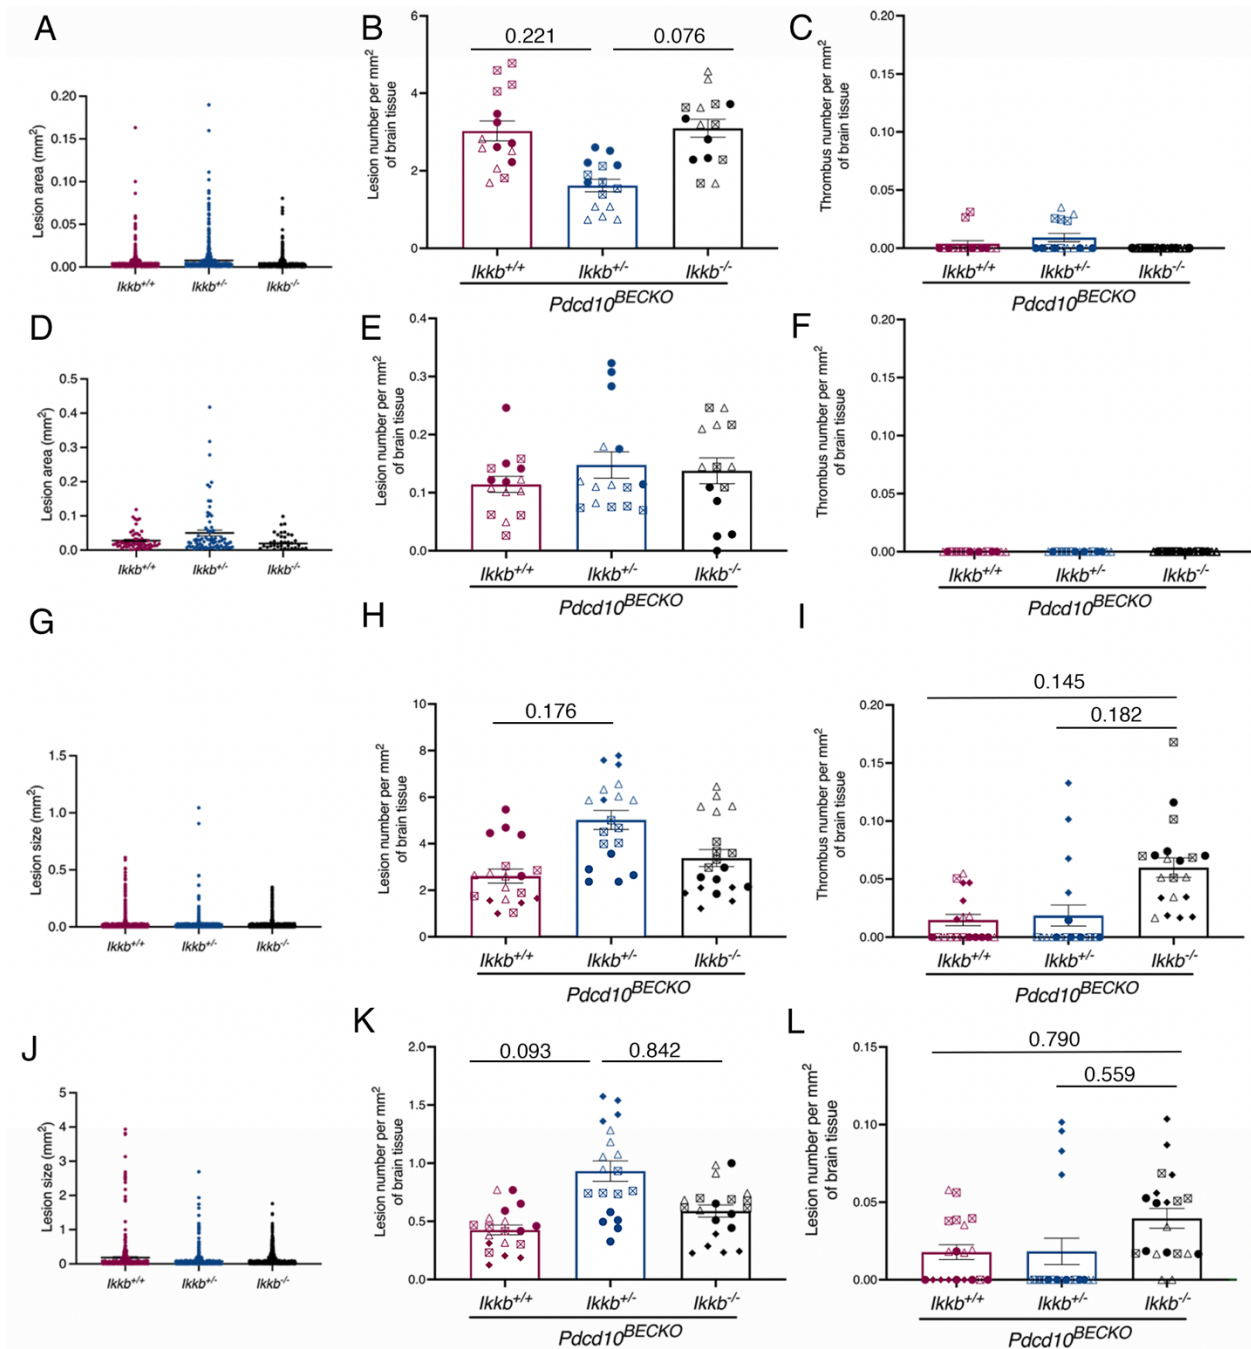

357  
 358 **Supplemental Figure 9. Loss of brain endothelial IKKb in acute and progression stage of**  
 359 **CCM disease. A,** Analysis and quantification of stage 1 (single cavernous) lesion size in P15  
 360 *Pcd10<sup>BECKO</sup>;Ikkb<sup>wt/wt</sup>* (*Pcd10<sup>BECKO</sup>;Ikkb<sup>+/+</sup>*), *Pcd10<sup>BECKO</sup>;Ikkb<sup>BECKO/wt</sup>* (*Pcd10<sup>BECKO</sup>;Ikkb<sup>+/-</sup>*) and  
 361 *Pcd10<sup>BECKO</sup>;Ikkb<sup>BECKO</sup>* (*Pcd10<sup>BECKO</sup>;Ikkb<sup>-/-</sup>*) brains. **B,** Analysis and quantification of the number  
 362 of stage 1 lesions per mm<sup>2</sup> in P15 *Pcd10<sup>BECKO</sup>;Ikkb<sup>wt/wt</sup>*, *Pcd10<sup>BECKO</sup>;Ikkb<sup>BECKO/wt</sup>* and  
 363 *Pcd10<sup>BECKO</sup>;Ikkb<sup>BECKO</sup>* brains. **C,** Analysis and quantification of the number of thrombi in stage 1  
 364 lesions per mm<sup>2</sup> in P15 *Pcd10<sup>BECKO</sup>;Ikkb<sup>wt/wt</sup>*, *Pcd10<sup>BECKO</sup>;Ikkb<sup>BECKO/wt</sup>* and  
 365 *Pcd10<sup>BECKO</sup>;Ikkb<sup>BECKO</sup>* brains. **D,** Analysis and quantification of stage 2 (multi-cavernous) lesion  
 366 size in P15 *Pcd10<sup>BECKO</sup>;Ikkb<sup>wt/wt</sup>*, *Pcd10<sup>BECKO</sup>;Ikkb<sup>BECKO/wt</sup>* and *Pcd10<sup>BECKO</sup>;Ikkb<sup>BECKO</sup>* brains. **E,**

367 Analysis and quantification of the number of stage 2 lesions per mm<sup>2</sup> in P15 *Pdcd10<sup>BECKO</sup>; Ikkb<sup>wt/wt</sup>*,  
 368 *Pdcd10<sup>BECKO</sup>; Ikkb<sup>BECKO/wt</sup>* and *Pdcd10<sup>BECKO</sup>; Ikkb<sup>BECKO</sup>* brains. **F**, Analysis and quantification of the  
 369 number of thrombi in stage 2 lesions per mm<sup>2</sup> in P15 *Pdcd10<sup>BECKO</sup>; Ikkb<sup>wt/wt</sup>*,  
 370 *Pdcd10<sup>BECKO</sup>; Ikkb<sup>BECKO/wt</sup>* and *Pdcd10<sup>BECKO</sup>; Ikkb<sup>BECKO</sup>* brains. **G**, Analysis and quantification of  
 371 stage 1 (single cavernous) lesion size in P50 *Pdcd10<sup>BECKO</sup>; Ikkb<sup>wt/wt</sup>*, *Pdcd10<sup>BECKO</sup>; Ikkb<sup>BECKO/wt</sup>* and  
 372 *Pdcd10<sup>BECKO</sup>; Ikkb<sup>BECKO</sup>* brains. **H**, Analysis and quantification of the number of stage 1 lesions per  
 373 mm<sup>2</sup> in P50 *Pdcd10<sup>BECKO</sup>; Ikkb<sup>wt/wt</sup>*, *Pdcd10<sup>BECKO</sup>; Ikkb<sup>BECKO/wt</sup>* and *Pdcd10<sup>BECKO</sup>; Ikkb<sup>BECKO</sup>* brains. **I**,  
 374 Analysis and quantification of the number of thrombi in stage 1 lesions per mm<sup>2</sup> in P50  
 375 *Pdcd10<sup>BECKO</sup>; Ikkb<sup>wt/wt</sup>*, *Pdcd10<sup>BECKO</sup>; Ikkb<sup>BECKO/wt</sup>* and *Pdcd10<sup>BECKO</sup>; Ikkb<sup>BECKO</sup>* brains. **J**, Analysis  
 376 and quantification of stage 2 (multi-cavernous) lesion size in P50 *Pdcd10<sup>BECKO</sup>; Ikkb<sup>wt/wt</sup>*,  
 377 *Pdcd10<sup>BECKO</sup>; Ikkb<sup>BECKO/wt</sup>* and *Pdcd10<sup>BECKO</sup>; Ikkb<sup>BECKO</sup>* brains. **K**, Analysis and quantification of the  
 378 number of stage 2 lesions per mm<sup>2</sup> in P50 *Pdcd10<sup>BECKO</sup>; Ikkb<sup>wt/wt</sup>*, *Pdcd10<sup>BECKO</sup>; Ikkb<sup>BECKO/wt</sup>* and  
 379 *Pdcd10<sup>BECKO</sup>; Ikkb<sup>BECKO</sup>* brains. **L**, Analysis and quantification of the number of thrombi in stage 2  
 380 lesions per mm<sup>2</sup> in P50 *Pdcd10<sup>BECKO</sup>; Ikkb<sup>wt/wt</sup>*, *Pdcd10<sup>BECKO</sup>; Ikkb<sup>BECKO/wt</sup>* and  
 381 *Pdcd10<sup>BECKO</sup>; Ikkb<sup>BECKO</sup>* brains. Animals were injected at P1 with 4-hydroxi-tamoxifen. Statistical  
 382 analysis is based on the average of 5 sections per animal. Data regarding lesion number per area  
 383 and thrombosis from each individual section is represented by three (B, C, E, F) or four (H, I, K,  
 384 L) different symbol shapes in the graphs, each set of shapes represents one animal (per group:  
 385 *filled circle*, animal 1; *triangle*, animal 2; *square*, animal 3; *rhomboid*, animal 4). All data are mean  
 386  $\pm$ SEM. P15 mice, n=3; P50 mice, n=4 (Kruskal-Wallis post hoc Dunn's test).

387

388 *Data Supplement Statistical Table*

389

390 **Online Statistical Analysis Data Tables**391 **Online table I: Sample size and normality test for data presented in main figures.**

| Figure    | Sample Group                     | Sample size | Shapiro-Wilk normality test P value | Passed normality test |
|-----------|----------------------------------|-------------|-------------------------------------|-----------------------|
| Figure 4B | PDCD10 <sup>BECKO</sup>          | 3           | 0.7838                              | Yes                   |
|           | PDCD10 <sup>BECKO</sup> + MCC950 | 3           | 0.2142                              | Yes                   |
|           | PDCD10 <sup>fl/fl</sup>          | 3           | 0.4489                              | Yes                   |
| Figure 4D | PDCD10 <sup>BECKO</sup>          | 10          | 0.4297                              | Yes                   |
|           | PDCD10 <sup>fl/fl</sup>          | 8           | 0.5691                              | Yes                   |
| Figure 5D | PDCD10 <sup>BECKO</sup>          | 5           | N too small                         | N/A                   |
|           | PDCD10 <sup>fl/fl</sup>          | 6           | 0.3253                              | Yes                   |
| Figure 5E | PDCD10 <sup>BECKO</sup> Neut     | 5           | N too small                         | N/A                   |
|           | PDCD10 <sup>fl/fl</sup> Neut     | 6           | 0.0044                              | No                    |
|           | PDCD10 <sup>BECKO</sup> Micro    | 5           | N too small                         | No                    |
|           | PDCD10 <sup>fl/fl</sup> Micro    | 6           | 0.2742                              | Yes                   |
|           | PDCD10 <sup>BECKO</sup> C mono   | 5           | N too small                         | No                    |
|           | PDCD10 <sup>fl/fl</sup> C mono   | 6           | 0.3633                              | Yes                   |

|                |                                              |   |             |     |
|----------------|----------------------------------------------|---|-------------|-----|
|                | PDCD10 <sup>BECKO</sup> NC mono              | 5 | N too small | No  |
|                | PDCD10 <sup>fl/fl</sup> NC mono              | 6 | 0.9628      | Yes |
|                | PDCD10 <sup>BECKO</sup> DC                   | 5 | N too small | N/A |
|                | PDCD10 <sup>fl/fl</sup> DC                   | 5 | N too small | N/A |
| Figure 5F      | PDCD10 <sup>BECKO</sup> CD4                  | 5 | N too small | N/A |
|                | PDCD10 <sup>fl/fl</sup> CD4                  | 6 | 0.1930      | N/A |
|                | PDCD10 <sup>BECKO</sup> CD8                  | 5 | N too small | N/A |
|                | PDCD10 <sup>fl/fl</sup> CD8                  | 6 | 0.0179      | No  |
|                | PDCD10 <sup>BECKO</sup> B cells              | 5 | N too small | N/A |
|                | PDCD10 <sup>fl/fl</sup> B cells              | 6 | 0.0259      | No  |
| Figure 5J      | PDCD10 <sup>BECKO</sup>                      | 3 | 0.7235      | Yes |
|                | PDCD10 <sup>fl/fl</sup>                      | 3 | 0.4821      | Yes |
| Figure 6A-E, G | PDCD10 <sup>BECKO</sup> ;Ikkb <sup>+/+</sup> | 3 | N too small | N/A |
|                | PDCD10 <sup>BECKO</sup> ;Ikkb <sup>+/-</sup> | 3 | N too small | N/A |
|                | PDCD10 <sup>BECKO</sup> ;Ikkb <sup>-/-</sup> | 3 | N too small | N/A |

392

**Online table II: Statistical tests and P values for data presented in main figures.**

| Figure    | Statistical test                                            | Sample Group                                                | P value                |
|-----------|-------------------------------------------------------------|-------------------------------------------------------------|------------------------|
| Figure 4B | One-Way ANOVA followed by Tukey's multiple comparisons test | PDCD10 <sup>BECKO</sup> vs PDCD10 <sup>BECKO</sup> + MCC950 | 0.001                  |
|           |                                                             | PDCD10 <sup>BECKO</sup> vs PDCD10 <sup>fl/fl</sup>          | 1.192x10 <sup>-4</sup> |
|           |                                                             | PDCD10 <sup>BECKO</sup> + MCC950 vs PDCD10 <sup>fl/fl</sup> | 0.034                  |
| Figure 4D | Unpaired two-tailed <i>t</i> test                           | PDCD10 <sup>BECKO</sup> vs PDCD10 <sup>fl/fl</sup>          | 0.0017                 |
| Figure 5D | Two-tailed Mann-Whitney test                                | PDCD10 <sup>BECKO</sup> vs PDCD10 <sup>fl/fl</sup>          | 0.0043                 |
| Figure 5E | Two-tailed Mann-Whitney test                                | PDCD10 <sup>BECKO</sup> vs PDCD10 <sup>fl/fl</sup> Neut     | 0.0043                 |
|           | Two-tailed Mann-Whitney test                                | PDCD10 <sup>BECKO</sup> vs PDCD10 <sup>fl/fl</sup> Micro    | 0.0043                 |
|           | Two-tailed Mann-Whitney test                                | PDCD10 <sup>BECKO</sup> vs PDCD10 <sup>fl/fl</sup> C Mono   | 0.0043                 |
|           | Two-tailed Mann-Whitney test                                | PDCD10 <sup>BECKO</sup> vs PDCD10 <sup>fl/fl</sup> NC Mono  | 0.0043                 |
|           | Two-tailed Mann-Whitney test                                | PDCD10 <sup>BECKO</sup> vs PDCD10 <sup>fl/fl</sup> DC       | 0.0043                 |
|           | Two-tailed Mann-Whitney test                                |                                                             |                        |

|           |                                                                                              |                                                                                                                                                                                                                                                                                                      |                                  |
|-----------|----------------------------------------------------------------------------------------------|------------------------------------------------------------------------------------------------------------------------------------------------------------------------------------------------------------------------------------------------------------------------------------------------------|----------------------------------|
| Figure 5F | Two-tailed Mann-Whitney test<br>Two-tailed Mann-Whitney test<br>Two-tailed Mann-Whitney test | PDCD10 <sup>BECKO</sup> vs PDCD10 <sup>fl/fl</sup> CD4<br>PDCD10 <sup>BECKO</sup> vs PDCD10 <sup>fl/fl</sup> CD8<br>PDCD10 <sup>BECKO</sup> vs PDCD10 <sup>fl/fl</sup> B cells                                                                                                                       | 0.0303<br>0.0043<br>0.0043       |
| Figure 5J | Unpaired two-tailed <i>t</i> test                                                            | PDCD10 <sup>BECKO</sup> vs PDCD10 <sup>fl/fl</sup>                                                                                                                                                                                                                                                   | 0.0012                           |
| Figure 6A | Kruskal-Wallis test followed by Dunn's multiple comparisons test                             | PDCD10 <sup>BECKO</sup> ;Ikkb <sup>+/+</sup> vs PDCD10 <sup>BECKO</sup> ;Ikkb <sup>+/-</sup><br><br>PDCD10 <sup>BECKO</sup> ;Ikkb <sup>+/+</sup> vs PDCD10 <sup>BECKO</sup> ;Ikkb <sup>-/-</sup><br><br>PDCD10 <sup>BECKO</sup> ;Ikkb <sup>+/-</sup> vs PDCD10 <sup>BECKO</sup> ;Ikkb <sup>-/-</sup> | 0.303<br><br>0.051<br><br>>0.999 |
| Figure 6B | Kruskal-Wallis test followed by Dunn's multiple comparisons test                             | PDCD10 <sup>BECKO</sup> ;Ikkb <sup>+/+</sup> vs PDCD10 <sup>BECKO</sup> ;Ikkb <sup>+/-</sup><br><br>PDCD10 <sup>BECKO</sup> ;Ikkb <sup>+/+</sup> vs PDCD10 <sup>BECKO</sup> ;Ikkb <sup>-/-</sup><br><br>PDCD10 <sup>BECKO</sup> ;Ikkb <sup>+/-</sup> vs PDCD10 <sup>BECKO</sup> ;Ikkb <sup>-/-</sup> | 0.324<br><br>0.045<br><br>0.325  |
| Figure 6C | Kruskal-Wallis test followed by Dunn's multiple comparisons test                             | PDCD10 <sup>BECKO</sup> ;Ikkb <sup>+/+</sup> vs PDCD10 <sup>BECKO</sup> ;Ikkb <sup>+/-</sup><br><br>PDCD10 <sup>BECKO</sup> ;Ikkb <sup>+/+</sup> vs PDCD10 <sup>BECKO</sup> ;Ikkb <sup>-/-</sup><br><br>PDCD10 <sup>BECKO</sup> ;Ikkb <sup>+/-</sup> vs PDCD10 <sup>BECKO</sup> ;Ikkb <sup>-/-</sup> | 0.095<br><br>0.091<br><br>>0.999 |
| Figure 6D | Kruskal-Wallis test followed by Dunn's multiple comparisons test                             | PDCD10 <sup>BECKO</sup> ;Ikkb <sup>+/+</sup> vs PDCD10 <sup>BECKO</sup> ;Ikkb <sup>+/-</sup><br><br>PDCD10 <sup>BECKO</sup> ;Ikkb <sup>+/+</sup> vs PDCD10 <sup>BECKO</sup> ;Ikkb <sup>-/-</sup><br><br>PDCD10 <sup>BECKO</sup> ;Ikkb <sup>+/-</sup> vs PDCD10 <sup>BECKO</sup> ;Ikkb <sup>-/-</sup> | >0.999<br><br>0.076<br><br>0.539 |
| Figure 6E | Kruskal-Wallis test followed by Dunn's multiple comparisons test                             | PDCD10 <sup>BECKO</sup> ;Ikkb <sup>+/+</sup> vs PDCD10 <sup>BECKO</sup> ;Ikkb <sup>+/-</sup>                                                                                                                                                                                                         | 0.915                            |

|           |                                                                        |                                                                                                 |        |
|-----------|------------------------------------------------------------------------|-------------------------------------------------------------------------------------------------|--------|
|           |                                                                        | PDCD10 <sup>BECKO</sup> ;Ikkb <sup>+/+</sup> vs<br>PDCD10 <sup>BECKO</sup> ;Ikkb <sup>-/-</sup> | 0.542  |
|           |                                                                        | PDCD10 <sup>BECKO</sup> ;Ikkb <sup>+/-</sup> vs<br>PDCD10 <sup>BECKO</sup> ;Ikkb <sup>-/-</sup> | 0.769  |
| Figure 6G | Kruskal-Wallis test followed<br>by Dunn's multiple<br>comparisons test | PDCD10 <sup>BECKO</sup> ;Ikkb <sup>+/+</sup> vs<br>PDCD10 <sup>BECKO</sup> ;Ikkb <sup>+/-</sup> | 0.303  |
|           |                                                                        | PDCD10 <sup>BECKO</sup> ;Ikkb <sup>+/+</sup> vs<br>PDCD10 <sup>BECKO</sup> ;Ikkb <sup>-/-</sup> | 0.890  |
|           |                                                                        | PDCD10 <sup>BECKO</sup> ;Ikkb <sup>+/-</sup> vs<br>PDCD10 <sup>BECKO</sup> ;Ikkb <sup>-/-</sup> | >0.999 |

393  
394  
395

**Online table III: Sample size and normality test for data presented in supplemental figures.**

| Figure               | Sample Group                                 | Sample size | Shapiro-Wilk<br>normality test P<br>value | Passed<br>normality<br>test |
|----------------------|----------------------------------------------|-------------|-------------------------------------------|-----------------------------|
| Supp.<br>Figure 5A   | PDCD10 <sup>BECKO</sup>                      | 9           | 0.4374                                    | Yes                         |
|                      | PDCD10 <sup>fl/fl</sup>                      | 7           | 0.0479                                    | No                          |
| Supp.<br>Figure 5B   | PDCD10 <sup>BECKO</sup>                      | 10          | 0.8987                                    | Yes                         |
|                      | PDCD10 <sup>fl/fl</sup>                      | 8           | 0.7719                                    | Yes                         |
| Supp.<br>Figure 5C   | PDCD10 <sup>BECKO</sup>                      | 10          | 0.1014                                    | Yes                         |
|                      | PDCD10 <sup>fl/fl</sup>                      | 8           | 0.1415                                    | Yes                         |
| Supp.<br>Figure 5D   | PDCD10 <sup>BECKO</sup>                      | 10          | 0.0436                                    | No                          |
|                      | PDCD10 <sup>fl/fl</sup>                      | 8           | 0.4254                                    | Yes                         |
| Supp.<br>Figure 9A-L | PDCD10 <sup>BECKO</sup> ;Ikkb <sup>+/+</sup> | 3           | N too small                               | N/A                         |
|                      | PDCD10 <sup>BECKO</sup> ;Ikkb <sup>+/-</sup> | 3           | N too small                               | N/A                         |
|                      | PDCD10 <sup>BECKO</sup> ;Ikkb <sup>-/-</sup> | 3           | N too small                               | N/A                         |

396  
397  
398

**Online table IV: Statistical tests and P values for data presented in supplemental figures.**

| Figure             | Statistical test                  | Sample Group                                       | P value |
|--------------------|-----------------------------------|----------------------------------------------------|---------|
| Supp.<br>Figure 5A | Two-tailed Mann-Whitney test      | PDCD10 <sup>BECKO</sup> vs PDCD10 <sup>fl/fl</sup> | 0.0079  |
| Supp.<br>Figure 5B | Unpaired two-tailed <i>t</i> test | PDCD10 <sup>BECKO</sup> vs PDCD10 <sup>fl/fl</sup> | 0.0147  |
| Supp.<br>Figure 5C | Unpaired two-tailed <i>t</i> test | PDCD10 <sup>BECKO</sup> vs PDCD10 <sup>fl/fl</sup> | 0.0083  |

|                 |                                                                  |                                                                                              |        |
|-----------------|------------------------------------------------------------------|----------------------------------------------------------------------------------------------|--------|
| Supp. Figure 5D | Two-tailed Mann-Whitney test                                     | PDCD10 <sup>BECKO</sup> vs PDCD10 <sup>fl/fl</sup>                                           | 0.4598 |
| Supp. Figure 9A | Kruskal-Wallis test followed by Dunn's multiple comparisons test | PDCD10 <sup>BECKO</sup> ;Ikkb <sup>+/+</sup> vs PDCD10 <sup>BECKO</sup> ;Ikkb <sup>+/-</sup> | 0.121  |
|                 |                                                                  | PDCD10 <sup>BECKO</sup> ;Ikkb <sup>+/+</sup> vs PDCD10 <sup>BECKO</sup> ;Ikkb <sup>-/-</sup> | 0.863  |
|                 |                                                                  | PDCD10 <sup>BECKO</sup> ;Ikkb <sup>+/-</sup> vs PDCD10 <sup>BECKO</sup> ;Ikkb <sup>-/-</sup> | 0.062  |
| Supp. Figure 9B | Kruskal-Wallis test followed by Dunn's multiple comparisons test | PDCD10 <sup>BECKO</sup> ;Ikkb <sup>+/+</sup> vs PDCD10 <sup>BECKO</sup> ;Ikkb <sup>+/-</sup> | 0.221  |
|                 |                                                                  | PDCD10 <sup>BECKO</sup> ;Ikkb <sup>+/+</sup> vs PDCD10 <sup>BECKO</sup> ;Ikkb <sup>-/-</sup> | >0.999 |
|                 |                                                                  | PDCD10 <sup>BECKO</sup> ;Ikkb <sup>+/-</sup> vs PDCD10 <sup>BECKO</sup> ;Ikkb <sup>-/-</sup> | 0.076  |
| Supp. Figure 9C | Kruskal-Wallis test followed by Dunn's multiple comparisons test | PDCD10 <sup>BECKO</sup> ;Ikkb <sup>+/+</sup> vs PDCD10 <sup>BECKO</sup> ;Ikkb <sup>+/-</sup> | 0.749  |
|                 |                                                                  | PDCD10 <sup>BECKO</sup> ;Ikkb <sup>+/+</sup> vs PDCD10 <sup>BECKO</sup> ;Ikkb <sup>-/-</sup> | >0.999 |
|                 |                                                                  | PDCD10 <sup>BECKO</sup> ;Ikkb <sup>+/-</sup> vs PDCD10 <sup>BECKO</sup> ;Ikkb <sup>-/-</sup> | 0.230  |
| Supp. Figure 9D | Kruskal-Wallis test followed by Dunn's multiple comparisons test | PDCD10 <sup>BECKO</sup> ;Ikkb <sup>+/+</sup> vs PDCD10 <sup>BECKO</sup> ;Ikkb <sup>+/-</sup> | 0.470  |
|                 |                                                                  | PDCD10 <sup>BECKO</sup> ;Ikkb <sup>+/+</sup> vs PDCD10 <sup>BECKO</sup> ;Ikkb <sup>-/-</sup> | 0.994  |
|                 |                                                                  | PDCD10 <sup>BECKO</sup> ;Ikkb <sup>+/-</sup> vs PDCD10 <sup>BECKO</sup> ;Ikkb <sup>-/-</sup> | 0.418  |
| Supp. Figure 9E | Kruskal-Wallis test followed by Dunn's multiple comparisons test | PDCD10 <sup>BECKO</sup> ;Ikkb <sup>+/+</sup> vs PDCD10 <sup>BECKO</sup> ;Ikkb <sup>+/-</sup> | 0.830  |
|                 |                                                                  | PDCD10 <sup>BECKO</sup> ;Ikkb <sup>+/+</sup> vs PDCD10 <sup>BECKO</sup> ;Ikkb <sup>-/-</sup> | 0.880  |
|                 |                                                                  | PDCD10 <sup>BECKO</sup> ;Ikkb <sup>+/-</sup> vs PDCD10 <sup>BECKO</sup> ;Ikkb <sup>-/-</sup> | 0.991  |

|                 |                                                                  |                                                                                              |        |
|-----------------|------------------------------------------------------------------|----------------------------------------------------------------------------------------------|--------|
| Supp. Figure 9F | Kruskal-Wallis test followed by Dunn's multiple comparisons test | PDCD10 <sup>BECKO</sup> ;lkkb <sup>+/+</sup> vs PDCD10 <sup>BECKO</sup> ;lkkb <sup>+/-</sup> | ns     |
|                 |                                                                  | PDCD10 <sup>BECKO</sup> ;lkkb <sup>+/+</sup> vs PDCD10 <sup>BECKO</sup> ;lkkb <sup>-/-</sup> | ns     |
|                 |                                                                  | PDCD10 <sup>BECKO</sup> ;lkkb <sup>+/-</sup> vs PDCD10 <sup>BECKO</sup> ;lkkb <sup>-/-</sup> | ns     |
| Supp. Figure 9G | Kruskal-Wallis test followed by Dunn's multiple comparisons test | PDCD10 <sup>BECKO</sup> ;lkkb <sup>+/+</sup> vs PDCD10 <sup>BECKO</sup> ;lkkb <sup>+/-</sup> | 0.187  |
|                 |                                                                  | PDCD10 <sup>BECKO</sup> ;lkkb <sup>+/+</sup> vs PDCD10 <sup>BECKO</sup> ;lkkb <sup>-/-</sup> | 0.464  |
|                 |                                                                  | PDCD10 <sup>BECKO</sup> ;lkkb <sup>+/-</sup> vs PDCD10 <sup>BECKO</sup> ;lkkb <sup>-/-</sup> | 0.775  |
| Supp. Figure 9H | Kruskal-Wallis test followed by Dunn's multiple comparisons test | PDCD10 <sup>BECKO</sup> ;lkkb <sup>+/+</sup> vs PDCD10 <sup>BECKO</sup> ;lkkb <sup>+/-</sup> | 0.176  |
|                 |                                                                  | PDCD10 <sup>BECKO</sup> ;lkkb <sup>+/+</sup> vs PDCD10 <sup>BECKO</sup> ;lkkb <sup>-/-</sup> | 0.822  |
|                 |                                                                  | PDCD10 <sup>BECKO</sup> ;lkkb <sup>+/-</sup> vs PDCD10 <sup>BECKO</sup> ;lkkb <sup>-/-</sup> | 0.398  |
| Supp. Figure 9I | Kruskal-Wallis test followed by Dunn's multiple comparisons test | PDCD10 <sup>BECKO</sup> ;lkkb <sup>+/+</sup> vs PDCD10 <sup>BECKO</sup> ;lkkb <sup>+/-</sup> | >0.999 |
|                 |                                                                  | PDCD10 <sup>BECKO</sup> ;lkkb <sup>+/+</sup> vs PDCD10 <sup>BECKO</sup> ;lkkb <sup>-/-</sup> | 0.145  |
|                 |                                                                  | PDCD10 <sup>BECKO</sup> ;lkkb <sup>+/-</sup> vs PDCD10 <sup>BECKO</sup> ;lkkb <sup>-/-</sup> | 0.182  |
| Supp. Figure 9J | Kruskal-Wallis test followed by Dunn's multiple comparisons test | PDCD10 <sup>BECKO</sup> ;lkkb <sup>+/+</sup> vs PDCD10 <sup>BECKO</sup> ;lkkb <sup>+/-</sup> | 0.191  |
|                 |                                                                  | PDCD10 <sup>BECKO</sup> ;lkkb <sup>+/+</sup> vs PDCD10 <sup>BECKO</sup> ;lkkb <sup>-/-</sup> | 0.613  |
|                 |                                                                  | PDCD10 <sup>BECKO</sup> ;lkkb <sup>+/-</sup> vs PDCD10 <sup>BECKO</sup> ;lkkb <sup>-/-</sup> | 0.628  |

|                    |                                                                        |                                                                                                 |        |
|--------------------|------------------------------------------------------------------------|-------------------------------------------------------------------------------------------------|--------|
| Supp.<br>Figure 9K | Kruskal-Wallis test followed<br>by Dunn's multiple<br>comparisons test | PDCD10 <sup>BECKO</sup> ;Ikkb <sup>+/+</sup> vs<br>PDCD10 <sup>BECKO</sup> ;Ikkb <sup>-/-</sup> | 0.093  |
|                    |                                                                        | PDCD10 <sup>BECKO</sup> ;Ikkb <sup>+/+</sup> vs<br>PDCD10 <sup>BECKO</sup> ;Ikkb <sup>-/-</sup> | 0.842  |
|                    |                                                                        | PDCD10 <sup>BECKO</sup> ;Ikkb <sup>+/-</sup> vs<br>PDCD10 <sup>BECKO</sup> ;Ikkb <sup>-/-</sup> | 0.398  |
| Supp.<br>Figure 9L | Kruskal-Wallis test followed<br>by Dunn's multiple<br>comparisons test | PDCD10 <sup>BECKO</sup> ;Ikkb <sup>+/+</sup> vs<br>PDCD10 <sup>BECKO</sup> ;Ikkb <sup>-/-</sup> | >0.999 |
|                    |                                                                        | PDCD10 <sup>BECKO</sup> ;Ikkb <sup>+/+</sup> vs<br>PDCD10 <sup>BECKO</sup> ;Ikkb <sup>-/-</sup> | 0.790  |
|                    |                                                                        | PDCD10 <sup>BECKO</sup> ;Ikkb <sup>+/-</sup> vs<br>PDCD10 <sup>BECKO</sup> ;Ikkb <sup>-/-</sup> | 0.559  |

399

400
