# Supplementary material
Source: PubMed Central journal article supplement (PMC9669201)
Supplement: NIHMS1842093-supplement-321129_Major_Resources_Table.pdf [file NIHMS1842093-supplement-321129_Major_Resources_Table.pdf]

## Major Resources Table

In order to allow validation and replication of experiments, all essential research materials listed in the Methods should be included in the Major Resources Table below. Authors are encouraged to use public repositories for protocols, data, code, and other materials and provide persistent identifiers and/or links to repositories when available. Authors may add or delete rows as needed.

### Animals (in vivo studies)

| Species      | Vendor or Source                                   | Background Strain       | Sex |
|--------------|----------------------------------------------------|-------------------------|-----|
| Mus musculus | Jackson Laboratory                                 | C57BL/6J                | F/M |
| Mus musculus | Gift from Markus Schwaninger, University of Lübeck | Slco1c1-CreERT2         | F/M |
| Mus musculus | Gift from Wang Min, Yale University                | Pdcd10 <sup>fl/fl</sup> | F/M |
| Mus musculus | Gift from Michael Karin, UCSD                      | Ikkb <sup>fl/fl</sup>   | F/M |
| Mus musculus | Jackson Laboratory                                 | Aldh111-EGFP/Rpl10a     | F/M |

### Genetically Modified Animals

|                 | Species      | Background Strain                                            |
|-----------------|--------------|--------------------------------------------------------------|
| Parent - Male   | Mus musculus | Slco1c1-CreERT2;Pdcd10 <sup>fl/fl</sup>                      |
| Parent - Female | Mus musculus | Pdcd10 <sup>fl/fl</sup>                                      |
| Parent - Male   | Mus musculus | Slco1c1-CreERT2;Ikkb <sup>fl/fl</sup>                        |
| Parent - Female | Mus musculus | Ikkb <sup>fl/fl</sup>                                        |
| Parent - Male   | Mus musculus | Slco1c1-CreERT2;Pdcd10 <sup>fl/fl</sup> ;Aldh111-EGFP/Rpl10a |
| Parent - Female | Mus musculus | Pdcd10 <sup>fl/fl</sup> ;Aldh111-EGFP/Rpl10a                 |

### Antibodies

| Target antigen                      | Vendor or Source        | Catalog # | Working concentration |
|-------------------------------------|-------------------------|-----------|-----------------------|
| GFAP                                | ThermoFisher Scientific | 13-0300   | 1:200                 |
| GFAP                                | Agilent Dako            | GA524     | 1:300                 |
| Iba1                                | FUJIFILM Wako           | 019-19741 | 1:100                 |
| Isolectin B4                        | Sigma-Aldrich           | L2895     | 1:80                  |
| Isolectin B4-Biotin                 | Sigma-Aldrich           | L2140     | 1:80                  |
| Anti-mouse CD41<br>(Clone: MWReg30) | Biologend               | 133907    | 1:50                  |
| Anti-mouse CD41<br>(Clone: MWReg30) | Biologend               | 133935    | 1:50                  |
| Anti-mouse CD45<br>(Clone: S18009D) | Biologend               | 160308    | 1:50                  |
| CX3CR1<br>(Clone: SA011F11)         | Biologend               | 149022    | 1:50                  |
| Ly6G<br>(Clone: 1A8)                | Biologend               | 127626    | 1:50                  |
| CD16/32<br>(Clone: S17011E)         | Biologend               | 156615    | 1:50                  |
| CD206<br>(Clone: C068C2)            | Biologend               | 141710    | 1:50                  |

DOI [to be added]

|                                            |                                      |             |       |
|--------------------------------------------|--------------------------------------|-------------|-------|
| VCAM1<br>(Clone 429<br>MVCAM.A)            | Biologend                            | 105712      | 1:500 |
| Anti-mouse CD45<br>(Clone: 30-F11)         | Biologend                            | 103129      | 1:200 |
| Anti-mouse Cd11b<br>(Clone: M1/70)         | Biologend                            | 101207      | 1:200 |
| Anti-mouse TCR $\beta$<br>(Clone: H57-597) | Biologend                            | 109207      | 1:200 |
| Anti-mouse CD4<br>(Clone: GK 1.5)          | Invitrogen                           | 14-0041-82  | 1:200 |
| Anti-mouse CD8<br>(Clone: 53-6.7)          | Biologend                            | 100721      | 1:200 |
| Anti-mouse CD19<br>(Clone: 6D5)            | Biologend                            | 115530      | 1:200 |
| Anti-mouse Ly6G<br>(Clone: 1A8)            | BD Biosciences                       | 561105      | 1:200 |
| Anti-mouse F4/80<br>(Clone: BM8)           | Biologend                            | 123147      | 1:200 |
| Anti-mouse CD206<br>(Clone: C068C2)        | Biologend                            | 141723      | 1:200 |
| Anti-mouse Ly6C<br>(Clone: HK1.4)          | Biologend                            | 128007      | 1:200 |
| Anti-mouse CD64<br>(Clone: X54-5/7.1)      | Biologend                            | 139305      | 1:200 |
| Anti-mouse CD11c<br>(Clone: N418)          | Biologend                            | 117307      | 1:200 |
| Anti-mouse CX3CR1<br>(Clone: SA011F11)     | Biologend                            | 149025      | 1:200 |
| Anti-Rabbit IgG,<br>Alexa Fluor 488        | Jackson ImmunoResearch<br>Laboratory | 711-546-152 | 1:300 |
| Anti-Rabbit IgG,<br>Alexa Fluor 594        | Jackson ImmunoResearch<br>Laboratory | 711-585-152 | 1:300 |
| Anti-Rat IgG, Alexa<br>Fluor 594           | Jackson ImmunoResearch<br>Laboratory | 112-586-052 | 1:300 |
| NDUFA4L2                                   | Proteintech                          | 16480-1-AP  | 1:50  |
| THBD                                       | R&D systems                          | AF3894      | 1:100 |
| CD74                                       | Biologend                            | 151002      | 1:100 |
| IL1b                                       | R&D Systems                          | AF-401-NA   | 1:500 |
| Phospho p65                                | Cell signaling                       | 3031S       | 1:500 |

#### Data & Code Availability

| Description | Source / Repository     | Persistent ID / URL |
|-------------|-------------------------|---------------------|
| RNAseq data | Gene Expression Omnibus | GSE204979           |

#### Other

| Description                                 | Source / Repository              |
|---------------------------------------------|----------------------------------|
| FAM-FLICA Caspase-1 probe                   | Immunochemistry technologies #97 |
| LD FVS700 Fixable dye                       | BD Biosciences #564997           |
| MCC950 Sodium                               | Selleckchem #S7809               |
| O.C.T. Compound                             | Fisher Scientific #4585          |
| (Z)-4-Hydroxytamoxifen                      | Tocris #3412                     |
| Fluoromount-G mounting medium               | Southern Biotec #0100-20         |
| MojoSort <sup>TM</sup> Mouse CD45 Nanobeads | Biologend #480028                |

DOI [to be added]

## ARRIVE GUIDELINES

The ARRIVE guidelines (<https://arriveguidelines.org/>) are a checklist of recommendations to improve the reporting of research involving animals. Key elements of the study design should be included below to better enable readers to scrutinize the research adequately, evaluate its methodological rigor, and reproduce the methods or findings.

### Study Design

| Groups                                                                                                                                                                                          | Sex | Age | Littermates (Yes/No) |
|-------------------------------------------------------------------------------------------------------------------------------------------------------------------------------------------------|-----|-----|----------------------|
| Slco1c1-CreERT2;Pdc10 <sup>fl/fl</sup><br>Pdc10 <sup>fl/fl</sup>                                                                                                                                | F/M | P15 | Yes                  |
| Slco1c1-CreERT2;Pdc10 <sup>fl/fl</sup><br>Pdc10 <sup>fl/fl</sup>                                                                                                                                | F/M | P50 | Yes                  |
| Slco1c1-CreERT2;Pdc10 <sup>fl/fl</sup><br>Pdc10 <sup>fl/fl</sup>                                                                                                                                | F/M | P80 | Yes                  |
| Slco1c1-CreERT2;Pdc10 <sup>fl/fl</sup> ;Aldh111-EGFP/Rpl10a<br>Pdc10 <sup>fl/fl</sup> ;Aldh111-EGFP/Rpl10a                                                                                      | F/M | P80 | Yes                  |
| Slco1c1-CreERT2;Pdc10 <sup>fl/fl</sup> ;Ikbb <sup>fl/fl</sup><br>Slco1c1-CreERT2;Pdc10 <sup>fl/fl</sup> ;Ikbb <sup>fl/wt</sup><br>Slco1c1-CreERT2;Pdc10 <sup>fl/fl</sup> ;Ikbb <sup>wt/wt</sup> | F/M | P15 | Yes                  |
| Slco1c1-CreERT2;Pdc10 <sup>fl/fl</sup> ;Ikbb <sup>fl/fl</sup><br>Slco1c1-CreERT2;Pdc10 <sup>fl/fl</sup> ;Ikbb <sup>fl/wt</sup><br>Slco1c1-CreERT2;Pdc10 <sup>fl/fl</sup> ;Ikbb <sup>wt/wt</sup> | F/M | P50 | Yes                  |
| Slco1c1-CreERT2;Pdc10 <sup>fl/fl</sup> ;Ikbb <sup>fl/fl</sup><br>Slco1c1-CreERT2;Pdc10 <sup>fl/fl</sup> ;Ikbb <sup>fl/wt</sup><br>Slco1c1-CreERT2;Pdc10 <sup>fl/fl</sup> ;Ikbb <sup>wt/wt</sup> | F/M | P80 | Yes                  |

**Sample Size:** Please explain how the sample size was decided Please provide details of any *prior* sample size calculation if done.

Sample sizes were calculated by assuming a two-sided alpha=0.05, 80% power, and homogeneous variances for two samples using estimates of means and standard deviation from previous studies<sup>4,13,15,16</sup>. At least three biologically independent experiments and multiple sections were analyzed to ensure reproducibility.

### Inclusion Criteria

Animals were genotyped between 2 and 3 weeks of age to confirm the genotypes. Genotypes were also performed at the end of the experiments when animals were euthanized.

### Exclusion Criteria

N/A

### Randomization

Animals were randomly assigned to treatment groups and for their genotype and gender. *Slco1c1-CreERT2;Pdc10<sup>fl/fl</sup>* and *Pdc10<sup>fl/fl</sup>* littermate controls were all injected with tamoxifen. In those cases where we used non-injected animals, these were randomized.

### Blinding

The experiments are blinded by researchers carrying out all experiments until all data is collected and analyzed.

DOI [to be added]
