# Supplementary material
Source: PubMed Central journal article supplement (PMC9669201)
Supplement: NIHMS1842093-supplement-321129_Uncut_Gel_Blots.pdf [file NIHMS1842093-supplement-321129_Uncut_Gel_Blots.pdf]

Full unedited gel for Figure 4E and Supplemental Figure 5A

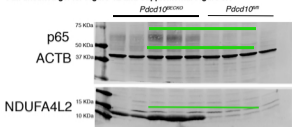

Full unedited gel for Supplemental Figure 5B

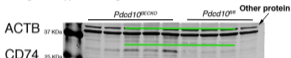

Full unedited gel for Supplemental Figure 5C

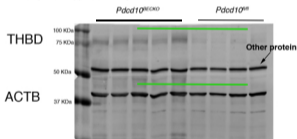

Full unedited gel for Supplemental Figure 5D

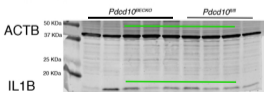

Lanes that correspond to those shown in the cropped images
